# Supplementary material for: Distinct clonal identities of B-ALLs arising after lenolidomide therapy for multiple myeloma
Source: PubMed Central journal article supplement — Blood Adv. 2022 Oct 21;7(2):236–45. doi: 10.1182/bloodadvances.2022007496 (PMC9860439; doi:10.1182/bloodadvances.2022007496), 2022-10-21
Supplement: BLOODA_ADV-2022-007496-mmc1.pdf [file BLOODA_ADV-2022-007496-mmc1.pdf]

**Supplementary Table 1. Whole Exome Sequencing (WES) quality for all samples used in WES analysis.** Each case had three sample types (normal tissue [skin or buccal swab], acute lymphoblastic leukemia, and multiple myeloma). Mean coverage represents average coverage across all bases in the target region. Percent bases 20X represents the total number of bases in the target region that attained at least 20X coverage, and percent on-target represents the total number of reads that aligned to target regions. Increased coverage (>100X coverage) was obtained for regions with spike-in, including the *TP53* locus.

| Sample Name | Tumor Type | Mean Coverage | Percent Bases 20X | Percent On-target | Call   |
|-------------|------------|---------------|-------------------|-------------------|--------|
| GTB-1       | germline   | 70.4          | 0.925             | 0.3569            | PASS   |
|             | ALL        | 50.3          | 0.920             | 0.3558            | PASS   |
|             | MM         | 30.4          | 0.924             | 0.3566            | PASS   |
| GTB-3       | germline   | 74.4          | 0.923             | 0.3564            | PASS   |
|             | ALL        | 25.5          | 0.924             | 0.3567            | PASS   |
|             | MM         | 25.5          | 0.935             | 0.3579            | PASS   |
| GTB-7       | germline   | 59.0          | 0.967             | 0.3243            | PASS   |
|             | ALL        | 94.2          | 0.979             | 0.249             | PASS   |
|             | MM         | 50.4          | 0.930             | 0.1118            | PASS   |
| GTB-8       | germline   | 112.5         | 0.972             | 0.7136            | PASS   |
|             | ALL        | 122.0         | 0.973             | 0.6916            | PASS   |
|             | MM         | 48.6          | 0.962             | 0.2098            | PASS   |
| GTB-9       | germline   | 79.4          | 0.976             | 0.3086            | PASS   |
|             | ALL        | 118.5         | 0.984             | 0.3108            | PASS   |
|             | MM         | 22.8          | 0.448             | 0.1520            | LOW QC |
| GTB-10      | germline   | 109.6         | 0.982             | 0.3082            | PASS   |
|             | ALL        | 94.1          | 0.972             | 0.2970            | PASS   |
|             | MM         | 27.4          | 0.601             | 0.0734            | LOW QC |
| GTB-11      | germline   | 109.6         | 0.981             | 0.3082            | PASS   |
|             | ALL        | 68.1          | 0.961             | 0.3386            | PASS   |
|             | MM         | N/A           | N/A               | N/A               | FAIL   |
| GTB-12      | germline   | 41.6          | 0.890             | 0.3275            | PASS   |
|             | ALL        | 103.7         | 0.982             | 0.3160            | PASS   |
|             | MM         | 17.4          | 0.348             | 0.2779            | LOW QC |

**Supplementary Table 2. Variant refinement process for all samples with whole exome sequencing.**

| <b>Sample</b> | <b>Tumor Type</b> | <b>Automated Called Variants</b> | <b>Variants Post-Filter</b> |
|---------------|-------------------|----------------------------------|-----------------------------|
| <b>GTB-1</b>  | MM<br>ALL         | 132<br>20                        | 123<br>16                   |
| <b>GTB-3</b>  | MM<br>ALL         | 70<br>70                         | 64<br>61                    |
| <b>GTB-7</b>  | MM<br>ALL         | 4,306<br>74                      | 295<br>13                   |
| <b>GTB-8</b>  | MM<br>ALL         | 719<br>24                        | 80<br>21                    |
| <b>GTB-9</b>  | MM<br>ALL         | 4,201<br>19                      | 86<br>13                    |
| <b>GTB-10</b> | MM<br>ALL         | 14,445<br>63                     | 319<br>57                   |
| <b>GTB-11</b> | MM<br>ALL         | --<br>56                         | --<br>47                    |
| <b>GTB-12</b> | MM<br>ALL         | 1,628<br>33                      | 6<br>27                     |

**Supplementary Table 3. All variants and variant allele frequencies (VAFs) identified by whole exome sequencing**

| <b>HGVSc</b>       | <b>Gene</b> | <b>ALL VAF</b> | <b>MM VAF</b> | <b>Tumor Observed</b> | <b>Sample Observed</b> |
|--------------------|-------------|----------------|---------------|-----------------------|------------------------|
| chr10:12825697A>G  | CAMK1D      | 0.00           | 0.15          | MM                    | GTB-9                  |
| chr10:47310565G>A  | GDF10       | 0.00           | 0.14          | MM                    | GTB-9                  |
| chr10:95069341C>G  | CYP2C8      | 0.00           | 0.29          | MM                    | GTB-9                  |
| chr11:102594715C>T | MMP20       | 0.00           | 0.17          | MM                    | GTB-9                  |
| chr11:20156315G>A  | DBX1        | 0.00           | 0.12          | MM                    | GTB-9                  |
| chr11:60842765G>A  | CCDC86      | 0.00           | 0.09          | MM                    | GTB-9                  |
| chr11:63765856C>T  | C11orf95    | 0.00           | 0.08          | MM                    | GTB-9                  |
| chr11:64832997G>A  | CDC42BPG    | 0.00           | 0.07          | MM                    | GTB-9                  |
| chr11:65662120G>T  | RELA        | 0.16           | 0.00          | ALL                   | GTB-9                  |
| chr12:111598978T>C | ATXN2       | 0.00           | 0.12          | MM                    | GTB-9                  |
| chr12:129078662C>T | TMEM132D    | 0.00           | 0.13          | MM                    | GTB-9                  |
| chr12:20552027C>T  | PDE3A       | 0.00           | 0.24          | MM                    | GTB-9                  |
| chr12:47773265C>T  | SLC48A1     | 0.00           | 0.08          | MM                    | GTB-9                  |
| chr12:52692429C>T  | KRT77       | 0.00           | 0.06          | MM                    | GTB-9                  |
| chr12:53214565C>T  | RARG        | 0.00           | 0.10          | MM                    | GTB-9                  |
| chr12:53307011G>A  | C12orf10    | 0.00           | 0.10          | MM                    | GTB-9                  |
| chr12:6581182G>GA  | CHD4        | 0.28           | 0.00          | ALL                   | GTB-9                  |
| chr12:69258917C>T  | CPSF6       | 0.00           | 0.09          | MM                    | GTB-9                  |
| chr12:71584150C>T  | LGR5        | 0.00           | 0.13          | MM                    | GTB-9                  |
| chr13:110715971G>T | ING1        | 0.00           | 0.09          | MM                    | GTB-9                  |
| chr13:36879599C>T  | SMAD9       | 0.00           | 0.10          | MM                    | GTB-9                  |
| chr13:77662146C>T  | AL450447.1  | 0.00           | 0.18          | MM                    | GTB-9                  |
| chr14:103127376G>A | TNFAIP2     | 0.00           | 0.14          | MM                    | GTB-9                  |
| chr14:105155879C>T | JAG2        | 0.00           | 0.10          | MM                    | GTB-9                  |
| chr14:20373344G>A  | TEP1        | 0.00           | 0.11          | MM                    | GTB-9                  |
| chr14:49894148A>G  | ARF6        | 0.00           | 0.27          | MM                    | GTB-9                  |
| chr14:61280365C>T  | TMEM30B     | 0.00           | 0.07          | MM                    | GTB-9                  |
| chr14:75003395G>A  | EIF2B2      | 0.00           | 0.10          | MM                    | GTB-9                  |
| chr15:33662297C>T  | RYR3        | 0.00           | 0.05          | MM                    | GTB-9                  |
| chr15:40340897C>T  | CCDC9B      | 0.00           | 0.10          | MM                    | GTB-9                  |
| chr15:70057549G>A  | TLE3        | 0.00           | 0.05          | MM                    | GTB-9                  |
| chr16:2234999G>A   | ECI1        | 0.00           | 0.10          | MM                    | GTB-9                  |
| chr16:2460201G>A   | CCNF        | 0.00           | 0.09          | MM                    | GTB-9                  |
| chr16:2762591G>A   | SRRM2       | 0.00           | 0.11          | MM                    | GTB-9                  |
| chr16:3729596C>T   | CREBBP      | 0.00           | 0.08          | MM                    | GTB-9                  |
| chr16:3769367G>A   | CREBBP      | 0.00           | 0.12          | MM                    | GTB-9                  |
| chr16:57751655C>T  | KATNB1      | 0.00           | 0.10          | MM                    | GTB-9                  |
| chr17:40478673G>A  | TNS4        | 0.00           | 0.13          | MM                    | GTB-9                  |
| chr17:41184477G>A  | KRTAP4-1    | 0.00           | 0.12          | MM                    | GTB-9                  |
| chr17:42795271C>T  | WNK4        | 0.00           | 0.06          | MM                    | GTB-9                  |
| chr17:75640933G>A  | SMIM5       | 0.00           | 0.07          | MM                    | GTB-9                  |
| chr17:7675085C>T   | TP53        | 0.30           | 0.00          | ALL                   | GTB-9                  |
| chr17:7779216C>T   | DNAH2       | 0.00           | 0.18          | MM                    | GTB-9                  |
| chr19:13105450C>T  | LYL1        | 0.00           | 0.05          | MM                    | GTB-9                  |
| chr19:1913068G>A   | ADAT3       | 0.00           | 0.06          | MM                    | GTB-9                  |
| chr19:3577994G>A   | HMG20B      | 0.00           | 0.05          | MM                    | GTB-9                  |
| chr19:38130545C>T  | SIPA1L3     | 0.00           | 0.11          | MM                    | GTB-9                  |
| chr19:38213747G>A  | DPF1        | 0.00           | 0.12          | MM                    | GTB-9                  |
| chr19:4207584G>A   | ANKRD24     | 0.00           | 0.13          | MM                    | GTB-9                  |
| chr19:48601051C>T  | FAM83E      | 0.00           | 0.09          | MM                    | GTB-9                  |

|                    |           |      |      |     |        |
|--------------------|-----------|------|------|-----|--------|
| chr19:49133886G>A  | PPFIA3    | 0.00 | 0.13 | MM  | GTB-9  |
| chr19:50514544C>T  | JOSD2     | 0.00 | 0.07 | MM  | GTB-9  |
| chr19:51009310C>T  | KLK9      | 0.00 | 0.12 | MM  | GTB-9  |
| chr19:51104312G>A  | CTU1      | 0.00 | 0.06 | MM  | GTB-9  |
| chr19:55182138G>A  | SYT5      | 0.00 | 0.07 | MM  | GTB-9  |
| chr19:55614947C>T  | ZNF865    | 0.00 | 0.05 | MM  | GTB-9  |
| chr1:113812119C>T  | RSBN1     | 0.00 | 0.13 | MM  | GTB-9  |
| chr1:12063611C>T   | TNFRSF8   | 0.00 | 0.06 | MM  | GTB-9  |
| chr1:15065800C>T   | KAZN      | 0.00 | 0.05 | MM  | GTB-9  |
| chr1:153003239C>T  | SPRR3     | 0.00 | 0.12 | MM  | GTB-9  |
| chr1:161048575C>T  | USF1      | 0.00 | 0.05 | MM  | GTB-9  |
| chr1:16484842C>G   | CROCCP3   | 0.00 | 0.17 | MM  | GTB-9  |
| chr1:16484881A>G   | CROCCP3   | 0.00 | 0.34 | MM  | GTB-9  |
| chr1:206635707G>A  | DYRK3     | 0.00 | 0.06 | MM  | GTB-9  |
| chr1:248847544C>T  | ZNF672    | 0.00 | 0.05 | MM  | GTB-9  |
| chr1:45607946A>G   | NASP      | 0.00 | 0.21 | MM  | GTB-9  |
| chr1:55154403G>A   | USP24     | 0.23 | 0.00 | ALL | GTB-9  |
| chr1:78641448A>G   | IFI44L    | 0.17 | 0.00 | ALL | GTB-9  |
| chr1:95173790C>T   | TMEM56    | 0.34 | 0.00 | ALL | GTB-9  |
| chr20:32797020G>A  | DNMT3B    | 0.00 | 0.06 | MM  | GTB-9  |
| chr20:46563601G>A  | SLC13A3   | 0.00 | 0.11 | MM  | GTB-9  |
| chr21:36232823T>C  | DOP1B     | 0.20 | 0.00 | ALL | GTB-9  |
| chr21:44425773C>T  | TRPM2     | 0.00 | 0.05 | MM  | GTB-9  |
| chr22:19048474G>T  | DGCR2     | 0.00 | 0.10 | MM  | GTB-9  |
| chr22:21183872C>T  | FAM230B   | 0.13 | 0.00 | ALL | GTB-9  |
| chr2:119158187G>A  | C1QL2     | 0.00 | 0.15 | MM  | GTB-9  |
| chr2:176172073G>T  | HOXD3     | 0.00 | 0.18 | MM  | GTB-9  |
| chr2:51028280G>A   | NRXN1     | 0.00 | 0.07 | MM  | GTB-9  |
| chr2:54624774T>G   | SPTBN1    | 0.00 | 0.21 | MM  | GTB-9  |
| chr2:71600796C>T   | DYSF      | 0.00 | 0.13 | MM  | GTB-9  |
| chr2:98821930G>A   | KIAA1211L | 0.00 | 0.16 | MM  | GTB-9  |
| chr3:165065320G>A  | SI        | 0.37 | 0.00 | ALL | GTB-9  |
| chr3:52435593C>T   | SEMA3G    | 0.00 | 0.08 | MM  | GTB-9  |
| chr5:148402073A>T  | FBXO38    | 0.13 | 0.00 | ALL | GTB-9  |
| chr5:80960744G>A   | RASGRF2   | 0.00 | 0.08 | MM  | GTB-9  |
| chr6:106099586G>T  | PRDM1     | 0.21 | 0.00 | ALL | GTB-9  |
| chr6:3273435G>A    | SLC22A23  | 0.00 | 0.10 | MM  | GTB-9  |
| chr7:127584513C>T  | GCC1      | 0.00 | 0.11 | MM  | GTB-9  |
| chr7:159097072G>A  | VIPR2     | 0.00 | 0.07 | MM  | GTB-9  |
| chr7:4178580G>A    | SDK1      | 0.31 | 0.00 | ALL | GTB-9  |
| chr7:48410658G>A   | ABCA13    | 0.00 | 0.22 | MM  | GTB-9  |
| chr7:99185086A>G   | KPNA7     | 0.00 | 0.17 | MM  | GTB-9  |
| chr8:141218674G>A  | SLC45A4   | 0.00 | 0.05 | MM  | GTB-9  |
| chr8:141219638C>T  | SLC45A4   | 0.00 | 0.10 | MM  | GTB-9  |
| chr9:109383367A>C  | PTPN3     | 0.00 | 0.12 | MM  | GTB-9  |
| chr9:123373221C>T  | CRB2      | 0.00 | 0.06 | MM  | GTB-9  |
| chr9:128633777G>C  | WDR34     | 0.31 | 0.00 | ALL | GTB-9  |
| chr9:129005425G>A  | NUP188    | 0.00 | 0.11 | MM  | GTB-9  |
| chr9:137457530C>T  | NSMF      | 0.00 | 0.09 | MM  | GTB-9  |
| chr10:103445449T>C | CALHM2    | 0.43 | 0.00 | ALL | GTB-10 |
| chr10:103602152G>A | SH3PXD2A  | 0.00 | 0.06 | MM  | GTB-10 |
| chr10:104196951C>A | CFAP43    | 0.00 | 0.35 | MM  | GTB-10 |

|                    |            |      |      |     |        |
|--------------------|------------|------|------|-----|--------|
| chr10:104977513A>G | SORCS3     | 0.50 | 0.00 | ALL | GTB-10 |
| chr10:113852848G>T | DCLRE1A    | 0.00 | 0.18 | MM  | GTB-10 |
| chr10:114631903T>C | ABLIM1     | 0.42 | 0.00 | ALL | GTB-10 |
| chr10:119036085G>T | EIF3A      | 0.00 | 0.20 | MM  | GTB-10 |
| chr10:121593796T>A | FGFR2      | 0.00 | 0.11 | MM  | GTB-10 |
| chr10:14839941G>A  | HSPA14     | 0.00 | 0.09 | MM  | GTB-10 |
| chr10:26567461G>A  | APBB1IP    | 0.00 | 0.13 | MM  | GTB-10 |
| chr10:50991383G>A  | PRKG1      | 0.00 | 0.07 | MM  | GTB-10 |
| chr10:63197581C>A  | JMJD1C     | 0.00 | 0.11 | MM  | GTB-10 |
| chr10:68572421G>A  | TET1       | 0.00 | 0.12 | MM  | GTB-10 |
| chr10:69898752G>A  | COL13A1    | 0.00 | 0.10 | MM  | GTB-10 |
| chr10:70771397C>T  | TBATA      | 0.00 | 0.16 | MM  | GTB-10 |
| chr10:71810124G>A  | CDH23      | 0.00 | 0.07 | MM  | GTB-10 |
| chr10:73495791C>T  | USP54      | 0.00 | 0.09 | MM  | GTB-10 |
| chr10:95336517C>T  | SORBS1     | 0.00 | 0.11 | MM  | GTB-10 |
| chr11:100297599C>T | CNTN5      | 0.00 | 0.20 | MM  | GTB-10 |
| chr11:118660684G>A | TREH       | 0.00 | 0.10 | MM  | GTB-10 |
| chr11:119317046G>A | MCAM       | 0.00 | 0.07 | MM  | GTB-10 |
| chr11:125678108G>A | ACRV1      | 0.48 | 0.00 | ALL | GTB-10 |
| chr11:1295805G>A   | TOLLIP     | 0.00 | 0.05 | MM  | GTB-10 |
| chr11:130209401G>A | ST14       | 0.43 | 0.00 | ALL | GTB-10 |
| chr11:14513609G>A  | AC018523.2 | 0.00 | 0.16 | MM  | GTB-10 |
| chr11:17635147G>A  | OTOG       | 0.00 | 0.07 | MM  | GTB-10 |
| chr11:17777571G>A  | KCNC1      | 0.00 | 0.08 | MM  | GTB-10 |
| chr11:1883438G>A   | LSP1       | 0.00 | 0.10 | MM  | GTB-10 |
| chr11:36592806G>A  | RAG2       | 0.00 | 0.14 | MM  | GTB-10 |
| chr11:57389052G>A  | AP000781.2 | 0.00 | 0.09 | MM  | GTB-10 |
| chr11:59192159C>T  | DTX4       | 0.38 | 0.00 | ALL | GTB-10 |
| chr11:6057729T>G   | OR52L2P    | 0.40 | 0.00 | ALL | GTB-10 |
| chr11:61796463G>A  | FEN1       | 0.00 | 0.10 | MM  | GTB-10 |
| chr11:62910612G>A  | CHRM1      | 0.00 | 0.15 | MM  | GTB-10 |
| chr11:6456338C>T   | TRIM3      | 0.00 | 0.11 | MM  | GTB-10 |
| chr11:65650555C>T  | SIPA1      | 0.00 | 0.07 | MM  | GTB-10 |
| chr11:66495554G>A  | DPP3       | 0.00 | 0.10 | MM  | GTB-10 |
| chr11:67281517G>A  | GRK2       | 0.45 | 0.00 | ALL | GTB-10 |
| chr11:72001549C>G  | RNF121     | 0.42 | 0.00 | ALL | GTB-10 |
| chr11:72231051G>A  | INPPL1     | 0.00 | 0.10 | MM  | GTB-10 |
| chr11:72824053G>T  | ATG16L2    | 0.00 | 0.10 | MM  | GTB-10 |
| chr11:74103458T>G  | C2CD3      | 0.48 | 0.00 | ALL | GTB-10 |
| chr11:7416128G>T   | SYT9       | 0.15 | 0.00 | ALL | GTB-10 |
| chr11:94619899G>A  | PIWIL4     | 0.00 | 0.09 | MM  | GTB-10 |
| chr12:108517239G>A | FICD       | 0.00 | 0.08 | MM  | GTB-10 |
| chr12:111341769C>T | CUX2       | 0.00 | 0.10 | MM  | GTB-10 |
| chr12:112950965C>T | OAS3       | 0.00 | 0.11 | MM  | GTB-10 |
| chr12:120215673G>A | PXN        | 0.00 | 0.17 | MM  | GTB-10 |
| chr12:132062593A>G | EP400      | 0.00 | 0.16 | MM  | GTB-10 |
| chr12:20552027C>T  | PDE3A      | 0.00 | 0.29 | MM  | GTB-10 |
| chr12:2677894A>G   | CACNA1C    | 0.85 | 0.00 | ALL | GTB-10 |
| chr12:31987303G>A  | KIAA1551   | 0.00 | 0.16 | MM  | GTB-10 |
| chr12:32625637C>T  | FGD4       | 0.00 | 0.15 | MM  | GTB-10 |
| chr12:5612785G>A   | ANO2       | 0.00 | 0.21 | MM  | GTB-10 |
| chr12:56210551A>G  | RNF41      | 0.90 | 0.00 | ALL | GTB-10 |

|                    |          |      |      |     |        |
|--------------------|----------|------|------|-----|--------|
| chr12:63668187C>T  | DPY19L2  | 0.00 | 0.11 | MM  | GTB-10 |
| chr12:80238870C>A  | OTOGL    | 0.00 | 0.08 | MM  | GTB-10 |
| chr13:110506478G>A | COL4A2   | 0.00 | 0.08 | MM  | GTB-10 |
| chr13:113667395C>T | GRK1     | 0.00 | 0.11 | MM  | GTB-10 |
| chr13:35156101C>T  | NBEA     | 0.27 | 0.00 | ALL | GTB-10 |
| chr13:38851800C>T  | FREM2    | 0.00 | 0.16 | MM  | GTB-10 |
| chr14:23346950G>A  | SLC22A17 | 0.00 | 0.12 | MM  | GTB-10 |
| chr14:23561563G>T  | AP1G2    | 0.00 | 0.14 | MM  | GTB-10 |
| chr14:24376828G>A  | NFATC4   | 0.00 | 0.09 | MM  | GTB-10 |
| chr14:49751725C>A  | KLHDC1   | 0.00 | 0.15 | MM  | GTB-10 |
| chr14:52315302G>A  | PTGER2   | 0.00 | 0.09 | MM  | GTB-10 |
| chr14:67582026G>T  | PLEKHH1  | 0.00 | 0.21 | MM  | GTB-10 |
| chr14:67807744G>A  | ZFYVE26  | 0.48 | 0.00 | ALL | GTB-10 |
| chr14:70667546C>T  | TTC9     | 0.00 | 0.12 | MM  | GTB-10 |
| chr14:77249387C>T  | TMEM63C  | 0.00 | 0.10 | MM  | GTB-10 |
| chr15:40418083G>T  | IVD      | 0.00 | 0.17 | MM  | GTB-10 |
| chr15:41886120C>T  | SPTBN5   | 0.00 | 0.10 | MM  | GTB-10 |
| chr15:43383514C>A  | TUBGCP4  | 0.00 | 0.18 | MM  | GTB-10 |
| chr15:44289093C>T  | CASC4    | 0.00 | 0.09 | MM  | GTB-10 |
| chr15:44958475G>T  | TERB2    | 0.00 | 0.16 | MM  | GTB-10 |
| chr15:52211895G>A  | MYO5C    | 0.00 | 0.13 | MM  | GTB-10 |
| chr15:52384191G>T  | MYO5A    | 0.00 | 0.09 | MM  | GTB-10 |
| chr15:58890312C>T  | SLTM     | 0.00 | 0.07 | MM  | GTB-10 |
| chr15:63716326C>T  | HERC1    | 0.00 | 0.07 | MM  | GTB-10 |
| chr15:65701917G>A  | DENND4A  | 0.00 | 0.22 | MM  | GTB-10 |
| chr15:74022939G>A  | PML      | 0.00 | 0.09 | MM  | GTB-10 |
| chr15:74023059G>A  | PML      | 0.00 | 0.06 | MM  | GTB-10 |
| chr15:78601880G>A  | CHRNA3   | 0.00 | 0.06 | MM  | GTB-10 |
| chr15:78629989C>A  | CHRNA4   | 0.00 | 0.10 | MM  | GTB-10 |
| chr15:79456712G>A  | MINAR1   | 0.90 | 0.00 | ALL | GTB-10 |
| chr15:80695765G>T  | ABHD17C  | 0.00 | 0.12 | MM  | GTB-10 |
| chr15:81332876G>T  | TMC3     | 0.00 | 0.11 | MM  | GTB-10 |
| chr15:81362295G>A  | TMC3     | 0.00 | 0.12 | MM  | GTB-10 |
| chr15:89797570C>T  | ANPEP    | 0.00 | 0.10 | MM  | GTB-10 |
| chr16:1385413G>A   | UNKL     | 0.00 | 0.09 | MM  | GTB-10 |
| chr16:192916C>T    | LUC7L    | 0.00 | 0.11 | MM  | GTB-10 |
| chr16:2003736C>A   | ZNF598   | 0.00 | 0.22 | MM  | GTB-10 |
| chr16:23475050G>A  | GGA2     | 0.00 | 0.20 | MM  | GTB-10 |
| chr16:2766309G>A   | SRRM2    | 0.00 | 0.07 | MM  | GTB-10 |
| chr16:31086696C>G  | PRSS53   | 0.87 | 0.00 | ALL | GTB-10 |
| chr16:3657143C>T   | DNASE1   | 0.00 | 0.07 | MM  | GTB-10 |
| chr16:653516G>T    | WDR90    | 0.00 | 0.07 | MM  | GTB-10 |
| chr16:68053589C>T  | DUS2     | 0.00 | 0.09 | MM  | GTB-10 |
| chr16:684270G>A    | STUB1    | 0.00 | 0.07 | MM  | GTB-10 |
| chr16:72794054G>T  | ZFH3     | 0.00 | 0.10 | MM  | GTB-10 |
| chr16:74381581C>G  | NPIP15   | 0.00 | 0.15 | MM  | GTB-10 |
| chr17:11555802C>T  | SHISA6   | 0.00 | 0.11 | MM  | GTB-10 |
| chr17:19331876T>C  | EPN2     | 0.91 | 0.00 | ALL | GTB-10 |
| chr17:28612309G>A  | SGK494   | 0.00 | 0.07 | MM  | GTB-10 |
| chr17:28716881G>T  | RPL23A   | 0.00 | 0.10 | MM  | GTB-10 |
| chr17:29086952C>T  | MYO18A   | 0.00 | 0.07 | MM  | GTB-10 |
| chr17:29098104C>T  | MYO18A   | 0.00 | 0.10 | MM  | GTB-10 |

|                   |               |      |      |     |        |
|-------------------|---------------|------|------|-----|--------|
| chr17:29572603C>T | TP53I13       | 0.00 | 0.08 | MM  | GTB-10 |
| chr17:30922083G>A | ADAP2         | 0.00 | 0.06 | MM  | GTB-10 |
| chr17:31320399G>A | AC134669.1    | 0.00 | 0.16 | MM  | GTB-10 |
| chr17:44774323G>A | ADAM11        | 0.00 | 0.07 | MM  | GTB-10 |
| chr17:45118806C>T | PLCD3         | 0.00 | 0.13 | MM  | GTB-10 |
| chr17:4673341G>A  | PELP1         | 0.00 | 0.06 | MM  | GTB-10 |
| chr17:49168904G>A | B4GALNT2      | 0.00 | 0.13 | MM  | GTB-10 |
| chr17:58307898C>T | TSPOAP1       | 0.00 | 0.07 | MM  | GTB-10 |
| chr17:62679886G>A | MRC2          | 0.00 | 0.08 | MM  | GTB-10 |
| chr17:64860317G>C | LRRC37A3      | 0.76 | 0.00 | ALL | GTB-10 |
| chr17:67944362G>A | BPTF          | 0.00 | 0.10 | MM  | GTB-10 |
| chr17:7284848C>T  | SLC2A4        | 0.00 | 0.17 | MM  | GTB-10 |
| chr17:7393531G>A  | PLSCR3        | 0.00 | 0.10 | MM  | GTB-10 |
| chr17:74947450T>C | HID1          | 0.89 | 0.00 | ALL | GTB-10 |
| chr17:7550786C>T  | NFSF12-TNFSF1 | 0.00 | 0.10 | MM  | GTB-10 |
| chr17:75876439C>T | TRIM47        | 0.00 | 0.09 | MM  | GTB-10 |
| chr17:7675097A>T  | TP53          | 0.89 | 0.00 | ALL | GTB-10 |
| chr17:78479639C>A | DNAH17        | 0.00 | 0.10 | MM  | GTB-10 |
| chr17:78974760C>T | LGALS3BP      | 0.00 | 0.12 | MM  | GTB-10 |
| chr17:80140008C>A | EIF4A3        | 0.00 | 0.11 | MM  | GTB-10 |
| chr17:82053321G>A | DUS1L         | 0.00 | 0.06 | MM  | GTB-10 |
| chr18:50285716C>T | MBD1          | 0.00 | 0.13 | MM  | GTB-10 |
| chr18:58671724C>T | MALT1         | 0.00 | 0.05 | MM  | GTB-10 |
| chr18:70324871C>A | SOCS6         | 0.00 | 0.24 | MM  | GTB-10 |
| chr19:10090057T>A | ANGPTL6       | 0.00 | 0.08 | MM  | GTB-10 |
| chr19:10107502C>T | PPAN-P2RY11   | 0.00 | 0.11 | MM  | GTB-10 |
| chr19:13308164G>A | CACNA1A       | 0.00 | 0.09 | MM  | GTB-10 |
| chr19:15189088G>A | NOTCH3        | 0.00 | 0.07 | MM  | GTB-10 |
| chr19:16076746C>T | TPM4          | 0.00 | 0.05 | MM  | GTB-10 |
| chr19:17259459T>C | AC010646.1    | 0.43 | 0.00 | ALL | GTB-10 |
| chr19:17328612G>C | ANO8          | 0.00 | 0.15 | MM  | GTB-10 |
| chr19:1912397C>T  | ADAT3         | 0.00 | 0.07 | MM  | GTB-10 |
| chr19:2038532G>A  | MKNK2         | 0.00 | 0.06 | MM  | GTB-10 |
| chr19:35299788G>A | MAG           | 0.00 | 0.08 | MM  | GTB-10 |
| chr19:36125524G>A | TBCB          | 0.00 | 0.15 | MM  | GTB-10 |
| chr19:39314512G>A | LRFN1         | 0.00 | 0.06 | MM  | GTB-10 |
| chr19:40321900C>T | C19orf47      | 0.45 | 0.00 | ALL | GTB-10 |
| chr19:41898568G>A | ARHGEF1       | 0.00 | 0.08 | MM  | GTB-10 |
| chr19:45802305G>A | RSPH6A        | 0.00 | 0.11 | MM  | GTB-10 |
| chr19:47353305C>T | DHX34         | 0.00 | 0.07 | MM  | GTB-10 |
| chr19:48182632C>A | ZSWIM9        | 0.00 | 0.07 | MM  | GTB-10 |
| chr19:48286919C>A | ZNF114        | 0.51 | 0.00 | ALL | GTB-10 |
| chr19:48625937G>A | DBP           | 0.00 | 0.08 | MM  | GTB-10 |
| chr19:49003267C>T | RUVBL2        | 0.00 | 0.09 | MM  | GTB-10 |
| chr19:50820400C>T | KLK1          | 0.00 | 0.13 | MM  | GTB-10 |
| chr19:50820401G>T | KLK1          | 0.00 | 0.13 | MM  | GTB-10 |
| chr19:50968027G>C | KLK6          | 0.15 | 0.00 | ALL | GTB-10 |
| chr19:56246882C>A | ZSCAN5DP      | 0.00 | 0.20 | MM  | GTB-10 |
| chr19:8334710G>A  | KANK3         | 0.00 | 0.06 | MM  | GTB-10 |
| chr1:107875014G>A | VAV3          | 0.00 | 0.23 | MM  | GTB-10 |
| chr1:109107951C>T | C1orf194      | 0.00 | 0.16 | MM  | GTB-10 |
| chr1:109108002C>T | C1orf194      | 0.00 | 0.10 | MM  | GTB-10 |

|                   |            |      |      |     |        |
|-------------------|------------|------|------|-----|--------|
| chr1:109191773C>A | KIAA1324   | 0.00 | 0.13 | MM  | GTB-10 |
| chr1:110518169C>A | KCNA10     | 0.00 | 0.10 | MM  | GTB-10 |
| chr1:11087388T>C  | EXOSC10    | 0.55 | 0.00 | ALL | GTB-10 |
| chr1:120069404C>T | NOTCH2     | 0.00 | 0.20 | MM  | GTB-10 |
| chr1:1284061G>A   | SCNN1D     | 0.00 | 0.10 | MM  | GTB-10 |
| chr1:13513354G>A  | LRRC38     | 0.00 | 0.12 | MM  | GTB-10 |
| chr1:149887270G>A | BOLA1      | 0.42 | 0.00 | ALL | GTB-10 |
| chr1:149887338G>A | BOLA1      | 0.00 | 0.10 | MM  | GTB-10 |
| chr1:151178000C>T | TMOD4      | 0.00 | 0.11 | MM  | GTB-10 |
| chr1:152107977C>T | TCHH       | 0.00 | 0.10 | MM  | GTB-10 |
| chr1:152155506C>T | RPTN       | 0.00 | 0.16 | MM  | GTB-10 |
| chr1:153936554C>T | DENND4B    | 0.00 | 0.10 | MM  | GTB-10 |
| chr1:154966338C>T | PYGO2      | 0.00 | 0.08 | MM  | GTB-10 |
| chr1:155868600G>T | SYT11      | 0.00 | 0.13 | MM  | GTB-10 |
| chr1:156592069G>A | NAXE       | 0.00 | 0.07 | MM  | GTB-10 |
| chr1:161052257T>C | ARHGAP30   | 0.00 | 0.20 | MM  | GTB-10 |
| chr1:161162324T>G | USP21      | 0.41 | 0.00 | ALL | GTB-10 |
| chr1:16484881A>G  | CROCCP3    | 0.00 | 0.33 | MM  | GTB-10 |
| chr1:171540738C>A | PRRC2C     | 0.00 | 0.15 | MM  | GTB-10 |
| chr1:17233005G>A  | PADI1      | 0.00 | 0.11 | MM  | GTB-10 |
| chr1:176702681C>T | PAPPA2     | 0.00 | 0.15 | MM  | GTB-10 |
| chr1:176957801G>A | ASTN1      | 0.00 | 0.10 | MM  | GTB-10 |
| chr1:182585914C>T | RNASEL     | 0.44 | 0.00 | ALL | GTB-10 |
| chr1:19285921C>T  | AKR7A3     | 0.00 | 0.14 | MM  | GTB-10 |
| chr1:20086223G>A  | PLA2G5     | 0.00 | 0.10 | MM  | GTB-10 |
| chr1:200911443C>T | INAVA      | 0.00 | 0.07 | MM  | GTB-10 |
| chr1:207564291T>G | CR1        | 0.36 | 0.00 | ALL | GTB-10 |
| chr1:21483099C>T  | NBPF3      | 0.00 | 0.12 | MM  | GTB-10 |
| chr1:215648593C>T | USH2A      | 0.00 | 0.05 | MM  | GTB-10 |
| chr1:224294416T>A | NVL        | 0.45 | 0.00 | ALL | GTB-10 |
| chr1:228321389G>A | OBSCN      | 0.00 | 0.10 | MM  | GTB-10 |
| chr1:233382433C>T | MAP3K21    | 0.00 | 0.11 | MM  | GTB-10 |
| chr1:24065940T>C  | MYOM3      | 0.44 | 0.00 | ALL | GTB-10 |
| chr1:24138590C>T  | IL22RA1    | 0.00 | 0.10 | MM  | GTB-10 |
| chr1:24344941G>A  | GRHL3      | 0.00 | 0.16 | MM  | GTB-10 |
| chr1:248814656G>A | SH3BP5L    | 0.00 | 0.19 | MM  | GTB-10 |
| chr1:26863457G>A  | SFN        | 0.00 | 0.05 | MM  | GTB-10 |
| chr1:36098073G>A  | ADPRHL2    | 0.00 | 0.10 | MM  | GTB-10 |
| chr1:37838720C>T  | MTF1       | 0.00 | 0.12 | MM  | GTB-10 |
| chr1:39380275C>A  | MACF1      | 0.00 | 0.16 | MM  | GTB-10 |
| chr1:39955430G>A  | MFSD2A     | 0.00 | 0.17 | MM  | GTB-10 |
| chr1:45051126A>G  | ZSWIM5     | 0.48 | 0.00 | ALL | GTB-10 |
| chr1:45206093G>A  | ZSWIM5     | 0.00 | 0.11 | MM  | GTB-10 |
| chr1:54014197C>T  | LDLRAD1    | 0.00 | 0.09 | MM  | GTB-10 |
| chr1:55058496C>T  | PCSK9      | 0.00 | 0.10 | MM  | GTB-10 |
| chr1:55075495C>T  | USP24      | 0.00 | 0.17 | MM  | GTB-10 |
| chr1:64838513G>T  | JAK1       | 0.00 | 0.12 | MM  | GTB-10 |
| chr1:70355234G>A  | ANKRD13C   | 0.00 | 0.14 | MM  | GTB-10 |
| chr1:70953072C>A  | PTGER3     | 0.00 | 0.20 | MM  | GTB-10 |
| chr1:72282518C>T  | NEGR1      | 0.00 | 0.10 | MM  | GTB-10 |
| chr1:76867672C>A  | ST6GALNAC5 | 0.00 | 0.11 | MM  | GTB-10 |
| chr1:873791G>A    | FAM41C     | 0.00 | 0.13 | MM  | GTB-10 |



|                   |             |      |      |     |        |
|-------------------|-------------|------|------|-----|--------|
| chr1:90717283C>A  | BARHL2      | 0.00 | 0.14 | MM  | GTB-10 |
| chr1:93180645C>T  | TMED5       | 0.00 | 0.15 | MM  | GTB-10 |
| chr20:13782865C>T | NDUFAF5     | 0.00 | 0.11 | MM  | GTB-10 |
| chr20:32228240C>T | POFUT1      | 0.00 | 0.24 | MM  | GTB-10 |
| chr20:33679810C>T | E2F1        | 0.00 | 0.11 | MM  | GTB-10 |
| chr20:3797591C>T  | CDC25B      | 0.00 | 0.10 | MM  | GTB-10 |
| chr20:41425251C>T | CHD6        | 0.00 | 0.13 | MM  | GTB-10 |
| chr20:43570994C>T | Z98752.3    | 0.00 | 0.17 | MM  | GTB-10 |
| chr20:45406472G>T | SYS1-DBNDD2 | 0.00 | 0.13 | MM  | GTB-10 |
| chr20:45834215C>T | SNX21       | 0.00 | 0.06 | MM  | GTB-10 |
| chr20:4699448C>T  | PRNP        | 0.00 | 0.09 | MM  | GTB-10 |
| chr20:47089388C>A | EYA2        | 0.00 | 0.17 | MM  | GTB-10 |
| chr20:63283814G>T | ARFGAP1     | 0.00 | 0.12 | MM  | GTB-10 |
| chr20:63532692G>A | PTK6        | 0.00 | 0.06 | MM  | GTB-10 |
| chr20:63592562C>T | GMEB2       | 0.00 | 0.14 | MM  | GTB-10 |
| chr20:63966639G>A | ZNF512B     | 0.00 | 0.06 | MM  | GTB-10 |
| chr20:63999098G>A | PRPF6       | 0.00 | 0.09 | MM  | GTB-10 |
| chr21:26170536C>T | APP         | 0.00 | 0.11 | MM  | GTB-10 |
| chr21:38822894G>A | ETS2        | 0.00 | 0.10 | MM  | GTB-10 |
| chr21:44654455T>C | TSPEAR      | 0.48 | 0.00 | ALL | GTB-10 |
| chr22:17524221T>A | CECR2       | 0.00 | 0.13 | MM  | GTB-10 |
| chr22:17540608C>A | CECR2       | 0.00 | 0.06 | MM  | GTB-10 |
| chr22:21044871T>G | LRRC74B     | 0.00 | 0.22 | MM  | GTB-10 |
| chr22:21446553G>A | HIC2        | 0.00 | 0.07 | MM  | GTB-10 |
| chr22:24554986C>T | SNRPD3      | 0.00 | 0.08 | MM  | GTB-10 |
| chr22:29311600C>G | RASL10A     | 0.40 | 0.00 | ALL | GTB-10 |
| chr22:30376578T>C | RNF215      | 0.00 | 0.10 | MM  | GTB-10 |
| chr22:36294283C>T | MYH9        | 0.00 | 0.15 | MM  | GTB-10 |
| chr22:38866485C>T | CBX6        | 0.00 | 0.06 | MM  | GTB-10 |
| chr22:40261820C>T | TNRC6B      | 0.00 | 0.12 | MM  | GTB-10 |
| chr22:42027011G>A | WBP2NL      | 0.00 | 0.10 | MM  | GTB-10 |
| chr22:43051840G>A | TTLL1       | 0.00 | 0.11 | MM  | GTB-10 |
| chr2:130915197C>T | ARHGEF4     | 0.00 | 0.13 | MM  | GTB-10 |
| chr2:131044556C>G | FAM168B     | 0.88 | 0.00 | ALL | GTB-10 |
| chr2:131363777G>C | RAB6D       | 0.81 | 0.00 | ALL | GTB-10 |
| chr2:140442504C>T | LRP1B       | 0.00 | 0.11 | MM  | GTB-10 |
| chr2:169139566G>T | LRP2        | 0.00 | 0.18 | MM  | GTB-10 |
| chr2:229791894C>T | TRIP12      | 0.00 | 0.26 | MM  | GTB-10 |
| chr2:231113882G>A | HTR2B       | 0.00 | 0.10 | MM  | GTB-10 |
| chr2:237749184C>T | LRRFIP1     | 0.00 | 0.10 | MM  | GTB-10 |
| chr2:26924860C>T  | DPYSL5      | 0.00 | 0.09 | MM  | GTB-10 |
| chr2:37951213G>T  | RMDN2       | 0.00 | 0.12 | MM  | GTB-10 |
| chr2:44301137G>A  | AC013717.1  | 0.00 | 0.11 | MM  | GTB-10 |
| chr2:46159705G>A  | PRKCE       | 0.00 | 0.13 | MM  | GTB-10 |
| chr2:62501458C>A  | TMEM17      | 0.00 | 0.14 | MM  | GTB-10 |
| chr2:73265555C>T  | FBXO41      | 0.00 | 0.12 | MM  | GTB-10 |
| chr2:85434976C>T  | SH2D6       | 0.00 | 0.12 | MM  | GTB-10 |
| chr2:85434981C>T  | SH2D6       | 0.00 | 0.10 | MM  | GTB-10 |
| chr2:96739969G>A  | LMAN2L      | 0.00 | 0.12 | MM  | GTB-10 |
| chr2:97660562C>T  | ACTR1B      | 0.00 | 0.14 | MM  | GTB-10 |
| chr3:125014924G>A | HEG1        | 0.00 | 0.19 | MM  | GTB-10 |
| chr3:125118769C>T | SLC12A8     | 0.00 | 0.10 | MM  | GTB-10 |

|                   |              |      |      |     |        |
|-------------------|--------------|------|------|-----|--------|
| chr3:127676249C>T | ABTB1        | 0.00 | 0.11 | MM  | GTB-10 |
| chr3:140466656C>T | CLSTN2       | 0.00 | 0.12 | MM  | GTB-10 |
| chr3:179027820C>A | ZMAT3        | 0.00 | 0.11 | MM  | GTB-10 |
| chr3:184289455G>A | EF1AKMT4-ECE | 0.00 | 0.11 | MM  | GTB-10 |
| chr3:186788387G>A | RFC4         | 0.00 | 0.11 | MM  | GTB-10 |
| chr3:195579506G>A | APOD         | 0.00 | 0.09 | MM  | GTB-10 |
| chr3:23965121C>T  | NR1D2        | 0.00 | 0.21 | MM  | GTB-10 |
| chr3:24123084G>T  | THRB         | 0.00 | 0.09 | MM  | GTB-10 |
| chr3:45968103C>T  | FYCO1        | 0.00 | 0.11 | MM  | GTB-10 |
| chr3:48583796T>A  | COL7A1       | 0.00 | 0.08 | MM  | GTB-10 |
| chr3:49642923C>A  | BSN          | 0.00 | 0.10 | MM  | GTB-10 |
| chr3:49642924G>A  | BSN          | 0.00 | 0.10 | MM  | GTB-10 |
| chr3:50215600G>A  | SLC38A3      | 0.00 | 0.13 | MM  | GTB-10 |
| chr3:51391637G>A  | MANF         | 0.00 | 0.09 | MM  | GTB-10 |
| chr3:52404549C>T  | BAP1         | 0.00 | 0.06 | MM  | GTB-10 |
| chr3:52787977T>C  | ITIH1        | 0.09 | 0.00 | ALL | GTB-10 |
| chr3:52788232T>G  | ITIH1        | 0.85 | 0.00 | ALL | GTB-10 |
| chr3:86978728A>C  | VGLL3        | 0.00 | 0.24 | MM  | GTB-10 |
| chr3:96814791G>A  | EPHA6        | 0.00 | 0.07 | MM  | GTB-10 |
| chr3:9757763C>T   | CAMK1        | 0.00 | 0.05 | MM  | GTB-10 |
| chr3:9947726G>A   | PRRT3        | 0.00 | 0.08 | MM  | GTB-10 |
| chr4:1003530C>T   | IDUA         | 0.00 | 0.06 | MM  | GTB-10 |
| chr4:10081444G>A  | WDR1         | 0.00 | 0.13 | MM  | GTB-10 |
| chr4:113357935G>A | ANK2         | 0.00 | 0.15 | MM  | GTB-10 |
| chr4:169117778C>T | SH3RF1       | 0.00 | 0.11 | MM  | GTB-10 |
| chr4:188003506G>A | ZFP42        | 0.00 | 0.12 | MM  | GTB-10 |
| chr4:188003627C>G | ZFP42        | 0.47 | 0.00 | ALL | GTB-10 |
| chr4:1956077G>T   | NSD2         | 0.00 | 0.11 | MM  | GTB-10 |
| chr4:20704506G>A  | PACRGL       | 0.00 | 0.14 | MM  | GTB-10 |
| chr4:40437917C>T  | RBM47        | 0.00 | 0.06 | MM  | GTB-10 |
| chr4:52076866G>A  | SPATA18      | 0.41 | 0.00 | ALL | GTB-10 |
| chr4:78424350A>G  | FRAS1        | 0.38 | 0.00 | ALL | GTB-10 |
| chr4:87615056C>T  | DSPP         | 0.00 | 0.10 | MM  | GTB-10 |
| chr4:87615057A>G  | DSPP         | 0.00 | 0.10 | MM  | GTB-10 |
| chr4:99208946G>A  | ADH6         | 0.00 | 0.17 | MM  | GTB-10 |
| chr5:1279407G>A   | TERT         | 0.48 | 0.00 | ALL | GTB-10 |
| chr5:135447039G>T | TIFAB        | 0.00 | 0.16 | MM  | GTB-10 |
| chr5:140510101C>T | ANKHD1       | 0.00 | 0.13 | MM  | GTB-10 |
| chr5:140700884G>A | ZMAT2        | 0.00 | 0.10 | MM  | GTB-10 |
| chr5:140856076G>A | PCDHA10      | 0.00 | 0.12 | MM  | GTB-10 |
| chr5:140877143C>T | PCDHA12      | 0.44 | 0.00 | ALL | GTB-10 |
| chr5:141241490A>G | AC244517.10  | 0.00 | 0.19 | MM  | GTB-10 |
| chr5:14461184A>G  | TRIO         | 0.49 | 0.00 | ALL | GTB-10 |
| chr5:146471591C>A | TCERG1       | 0.46 | 0.00 | ALL | GTB-10 |
| chr5:150369510C>T | TCOF1        | 0.00 | 0.11 | MM  | GTB-10 |
| chr5:150387886G>T | TCOF1        | 0.00 | 0.16 | MM  | GTB-10 |
| chr5:173318264C>A | STC2         | 0.00 | 0.09 | MM  | GTB-10 |
| chr5:179122724C>T | ADAMTS2      | 0.00 | 0.09 | MM  | GTB-10 |
| chr5:179795707G>A | LTC4S        | 0.00 | 0.13 | MM  | GTB-10 |
| chr5:67165335G>A  | MAST4        | 0.00 | 0.07 | MM  | GTB-10 |
| chr5:72320552G>A  | PTCD2        | 0.00 | 0.12 | MM  | GTB-10 |
| chr5:72956039C>T  | FCHO2        | 0.00 | 0.11 | MM  | GTB-10 |

|                   |           |      |      |     |        |
|-------------------|-----------|------|------|-----|--------|
| chr5:79237048G>A  | JMY       | 0.00 | 0.11 | MM  | GTB-10 |
| chr6:110442708G>A | SLC22A16  | 0.00 | 0.11 | MM  | GTB-10 |
| chr6:116590301T>C | RWDD1     | 0.42 | 0.00 | ALL | GTB-10 |
| chr6:119348627G>T | MAN1A1    | 0.00 | 0.11 | MM  | GTB-10 |
| chr6:142770475G>C | HIVEP2    | 0.42 | 0.00 | ALL | GTB-10 |
| chr6:151349186C>A | AKAP12    | 0.00 | 0.16 | MM  | GTB-10 |
| chr6:26158433G>A  | HIST1H2BD | 0.00 | 0.09 | MM  | GTB-10 |
| chr6:26465401T>A  | BTN2A1    | 0.00 | 0.17 | MM  | GTB-10 |
| chr6:28276791G>A  | PGBD1     | 0.40 | 0.00 | ALL | GTB-10 |
| chr6:33688448G>A  | ITPR3     | 0.00 | 0.17 | MM  | GTB-10 |
| chr6:37476193A>G  | CMTR1     | 0.42 | 0.00 | ALL | GTB-10 |
| chr6:40392516C>T  | LRFN2     | 0.00 | 0.06 | MM  | GTB-10 |
| chr6:41806073G>A  | USP49     | 0.00 | 0.09 | MM  | GTB-10 |
| chr6:70260649C>T  | COL9A1    | 0.00 | 0.13 | MM  | GTB-10 |
| chr6:73362686G>T  | KHDC3L    | 0.00 | 0.11 | MM  | GTB-10 |
| chr7:100211848C>A | CASTOR3   | 0.00 | 0.11 | MM  | GTB-10 |
| chr7:100775667A>T | ZAN       | 0.00 | 0.11 | MM  | GTB-10 |
| chr7:105110453G>T | KMT2E     | 0.00 | 0.16 | MM  | GTB-10 |
| chr7:116525113G>A | CAV1      | 0.00 | 0.09 | MM  | GTB-10 |
| chr7:117138463C>A | ST7       | 0.00 | 0.11 | MM  | GTB-10 |
| chr7:122303973G>A | FEZF1     | 0.00 | 0.15 | MM  | GTB-10 |
| chr7:127582223C>T | GCC1      | 0.00 | 0.10 | MM  | GTB-10 |
| chr7:1439912C>T   | MICALL2   | 0.00 | 0.11 | MM  | GTB-10 |
| chr7:149154108G>A | ZNF398    | 0.00 | 0.10 | MM  | GTB-10 |
| chr7:44885247C>T  | PURB      | 0.00 | 0.07 | MM  | GTB-10 |
| chr7:47809524C>T  | PKD1L1    | 0.00 | 0.13 | MM  | GTB-10 |
| chr7:55170467C>T  | EGFR      | 0.00 | 0.09 | MM  | GTB-10 |
| chr7:64260908G>A  | ZNF679    | 0.00 | 0.27 | MM  | GTB-10 |
| chr7:73477799C>T  | BAZ1B     | 0.00 | 0.09 | MM  | GTB-10 |
| chr7:78078994C>T  | MAGI2     | 0.00 | 0.13 | MM  | GTB-10 |
| chr7:98959529G>A  | TRRAP     | 0.00 | 0.10 | MM  | GTB-10 |
| chr8:100522648C>A | ANKRD46   | 0.00 | 0.12 | MM  | GTB-10 |
| chr8:10607809C>T  | RP1L1     | 0.00 | 0.07 | MM  | GTB-10 |
| chr8:106761294C>T | ABRA      | 0.00 | 0.10 | MM  | GTB-10 |
| chr8:123396284G>A | ATAD2     | 0.00 | 0.08 | MM  | GTB-10 |
| chr8:125055616T>A | WASHC5    | 0.40 | 0.00 | ALL | GTB-10 |
| chr8:141221610C>A | SLC45A4   | 0.00 | 0.06 | MM  | GTB-10 |
| chr8:144392436C>T | ADCK5     | 0.00 | 0.11 | MM  | GTB-10 |
| chr8:144520483C>A | LRRC14    | 0.46 | 0.00 | ALL | GTB-10 |
| chr8:55102515G>A  | XKR4      | 0.00 | 0.11 | MM  | GTB-10 |
| chr8:60848525C>T  | CHD7      | 0.54 | 0.00 | ALL | GTB-10 |
| chr8:66666161C>G  | VCPIP1    | 0.46 | 0.00 | ALL | GTB-10 |
| chr8:80518513G>A  | ZBTB10    | 0.00 | 0.20 | MM  | GTB-10 |
| chr9:128234036C>T | DNM1      | 0.00 | 0.07 | MM  | GTB-10 |
| chr9:128612187G>A | SPTAN1    | 0.00 | 0.11 | MM  | GTB-10 |
| chr9:137053939G>A | ENTPD2    | 0.00 | 0.06 | MM  | GTB-10 |
| chr9:137161453G>A | GRIN1     | 0.00 | 0.11 | MM  | GTB-10 |
| chr9:137522828G>A | PNPLA7    | 0.00 | 0.06 | MM  | GTB-10 |
| chr9:18504818G>T  | ADAMTSL1  | 0.00 | 0.12 | MM  | GTB-10 |
| chr9:35072363C>T  | VCP       | 0.00 | 0.07 | MM  | GTB-10 |
| chr9:35547141G>A  | RUSC2     | 0.00 | 0.10 | MM  | GTB-10 |
| chr9:35793071G>A  | NPR2      | 0.00 | 0.07 | MM  | GTB-10 |

|                        |            |      |      |     |        |
|------------------------|------------|------|------|-----|--------|
| chr9:5832846C>T        | ERMP1      | 0.00 | 0.09 | MM  | GTB-10 |
| chr9:69234466G>A       | AL358113.1 | 0.00 | 0.12 | MM  | GTB-10 |
| chr9:70625351C>A       | TRPM3      | 0.00 | 0.14 | MM  | GTB-10 |
| chr9:83248062C>A       | FRMD3      | 0.00 | 0.10 | MM  | GTB-10 |
| chr9:86945768G>A       | GAS1       | 0.00 | 0.08 | MM  | GTB-10 |
| chr9:97546336A>C       | TMOD1      | 0.90 | 0.00 | ALL | GTB-10 |
| chrX:40663026C>T       | MED14      | 0.96 | 0.00 | ALL | GTB-10 |
| chrX:41474560C>T       | NYX        | 0.00 | 0.10 | MM  | GTB-10 |
| chrX:50192528C>T       | AKAP4      | 0.95 | 0.00 | ALL | GTB-10 |
| chr10:101227514C>T     | LBX1       | 0.00 | 0.62 | MM  | GTB-1  |
| chr10:116859060A>C     | ENO4       | 0.00 | 0.65 | MM  | GTB-1  |
| chr10:122982741A>G     | PSTK       | 0.31 | 0.00 | ALL | GTB-1  |
| chr10:127409060G>A     | DOCK1      | 0.00 | 0.65 | MM  | GTB-1  |
| chr10:133326109G>A     | CALY       | 0.00 | 0.29 | MM  | GTB-1  |
| chr10:13492671G>T      | BEND7      | 0.00 | 0.34 | MM  | GTB-1  |
| chr10:16754984T>C      | RSU1       | 0.00 | 0.29 | MM  | GTB-1  |
| chr10:27208435C>T      | ACBD5      | 0.00 | 0.21 | MM  | GTB-1  |
| chr10:49386622C>T      | DRGX       | 0.00 | 0.66 | MM  | GTB-1  |
| chr10:49391299G>A      | DRGX       | 0.31 | 0.00 | ALL | GTB-1  |
| chr10:68188977G>T      | MYPN       | 0.00 | 0.66 | MM  | GTB-1  |
| chr10:81875454GGACGGCC | NRG3       | 0.00 | 0.08 | MM  | GTB-1  |
| chr10:96157431G>A      | ZNF518A    | 0.00 | 0.31 | MM  | GTB-1  |
| chr10:97366058G>T      | RRP12      | 0.00 | 0.57 | MM  | GTB-1  |
| chr11:119274905A>G     | CBL        | 0.00 | 0.61 | MM  | GTB-1  |
| chr11:130120769G>A     | APLP2      | 0.00 | 0.59 | MM  | GTB-1  |
| chr11:56253017C>T      | OR5T3      | 0.00 | 0.58 | MM  | GTB-1  |
| chr11:61259308G>T      | VWCE       | 0.00 | 0.56 | MM  | GTB-1  |
| chr11:870158C>T        | TSPAN4     | 0.00 | 0.59 | MM  | GTB-1  |
| chr12:117860350C>A     | KSR2       | 0.00 | 0.49 | MM  | GTB-1  |
| chr12:21205976T>G      | SLCO1B1    | 0.00 | 0.45 | MM  | GTB-1  |
| chr12:21558244T>G      | GYS2       | 0.00 | 0.51 | MM  | GTB-1  |
| chr12:21815724T>G      | ABCC9      | 0.00 | 0.43 | MM  | GTB-1  |
| chr12:25245332G>T      | KRAS       | 0.00 | 0.19 | MM  | GTB-1  |
| chr12:53295590C>T      | PFDN5      | 0.41 | 0.00 | ALL | GTB-1  |
| chr12:55937422G>A      | DGKA       | 0.00 | 0.21 | MM  | GTB-1  |
| chr12:56468582A>C      | SPRYD4     | 0.00 | 0.22 | MM  | GTB-1  |
| chr12:6971105G>A       | EMG1       | 0.00 | 0.16 | MM  | GTB-1  |
| chr12:94411851G>GT     | CEP83      | 0.00 | 0.20 | MM  | GTB-1  |
| chr13:37105335C>T      | CSNK1A1L   | 0.00 | 0.45 | MM  | GTB-1  |
| chr13:43298454C>T      | ENOX1      | 0.00 | 0.48 | MM  | GTB-1  |
| chr14:103654716A>T     | AL139300.1 | 0.00 | 0.48 | MM  | GTB-1  |
| chr14:104743211A>T     | ADSSL1     | 0.00 | 0.23 | MM  | GTB-1  |
| chr14:33801112C>T      | NPAS3      | 0.00 | 0.41 | MM  | GTB-1  |
| chr14:41887466G>T      | LRFN5      | 0.00 | 0.45 | MM  | GTB-1  |
| chr15:101819079T>C     | OR4F15     | 0.00 | 0.30 | MM  | GTB-1  |
| chr15:67254649G>A      | AAGAB      | 0.48 | 0.00 | ALL | GTB-1  |
| chr15:96331247G>A      | NR2F2      | 0.00 | 0.60 | MM  | GTB-1  |
| chr17:31899623G>T      | UTP6       | 0.00 | 0.44 | MM  | GTB-1  |
| chr17:42536340G>A      | NAGLU      | 0.00 | 0.24 | MM  | GTB-1  |
| chr17:42762697C>T      | RAMP2      | 0.00 | 0.19 | MM  | GTB-1  |
| chr17:47813591C>A      | OSBPL7     | 0.00 | 0.19 | MM  | GTB-1  |
| chr17:49133213G>A      | B4GALNT2   | 0.00 | 0.22 | MM  | GTB-1  |

|                         |            |      |      |     |       |
|-------------------------|------------|------|------|-----|-------|
| chr17:58506757C>A       | MTMR4      | 0.00 | 0.49 | MM  | GTB-1 |
| chr17:59838272GGGCTACT: | VMP1       | 0.00 | 0.48 | MM  | GTB-1 |
| chr17:59838281T>A       | VMP1       | 0.00 | 0.45 | MM  | GTB-1 |
| chr17:66220559C>T       | APOH       | 0.00 | 0.48 | MM  | GTB-1 |
| chr17:73261762G>A       | CPSF4L     | 0.00 | 0.45 | MM  | GTB-1 |
| chr17:76152455C>T       | RNF157     | 0.00 | 0.27 | MM  | GTB-1 |
| chr17:7674253A>T        | TP53       | 0.67 | 0.00 | ALL | GTB-1 |
| chr17:81922943G>C       | MAFG       | 0.00 | 0.49 | MM  | GTB-1 |
| chr18:76496529C>T       | ZNF516     | 0.00 | 0.20 | MM  | GTB-1 |
| chr19:39927076G>A       | FCGBP      | 0.00 | 0.33 | MM  | GTB-1 |
| chr19:44387864A>G       | AC245748.1 | 0.00 | 0.64 | MM  | GTB-1 |
| chr19:46006619C>G       | CCDC61     | 0.43 | 0.00 | ALL | GTB-1 |
| chr19:52314137G>T       | ZNF480     | 0.00 | 0.59 | MM  | GTB-1 |
| chr1:109107961A>T       | C1orf194   | 0.00 | 0.63 | MM  | GTB-1 |
| chr1:116579654G>A       | IGSF3      | 0.00 | 0.62 | MM  | GTB-1 |
| chr1:16032433C>T        | CLCNKA     | 0.00 | 0.64 | MM  | GTB-1 |
| chr1:161119827G>A       | PFDN2      | 0.00 | 0.30 | MM  | GTB-1 |
| chr1:16630991C>T        | CROCCP2    | 0.00 | 0.21 | MM  | GTB-1 |
| chr1:167901614AG>A      | ADCY10     | 0.51 | 0.00 | ALL | GTB-1 |
| chr1:16938963G>A        | CROCC      | 0.00 | 0.27 | MM  | GTB-1 |
| chr1:171196723C>A       | FMO2       | 0.00 | 0.29 | MM  | GTB-1 |
| chr1:214646605A>T       | CENPF      | 0.36 | 0.00 | ALL | GTB-1 |
| chr1:229299001C>T       | RAB4A      | 0.00 | 0.74 | MM  | GTB-1 |
| chr1:39567831T>G        | PABPC4     | 0.00 | 0.49 | MM  | GTB-1 |
| chr1:51792141A>C        | NRDC       | 0.31 | 0.00 | ALL | GTB-1 |
| chr1:6554127G>C         | NOL9       | 0.00 | 0.27 | MM  | GTB-1 |
| chr1:84929639T>C        | MCOLN2     | 0.00 | 0.26 | MM  | GTB-1 |
| chr1:90716956G>C        | BARHL2     | 0.44 | 0.00 | ALL | GTB-1 |
| chr20:20056797G>A       | CFAP61     | 0.00 | 0.43 | MM  | GTB-1 |
| chr20:41345866C>T       | LPIN3      | 0.00 | 0.43 | MM  | GTB-1 |
| chr20:45552194C>A       | WFDC8      | 0.00 | 0.24 | MM  | GTB-1 |
| chr20:57498638A>T       | CTCFL      | 0.00 | 0.45 | MM  | GTB-1 |
| chr20:62799662G>A       | MRGBP      | 0.48 | 0.00 | ALL | GTB-1 |
| chr21:33262801T>C       | IL10RB     | 0.00 | 0.38 | MM  | GTB-1 |
| chr21:33262822T>C       | IL10RB     | 0.00 | 0.38 | MM  | GTB-1 |
| chr21:46001345G>A       | COL6A1     | 0.00 | 0.49 | MM  | GTB-1 |
| chr22:22901084C>T       | IGLC2      | 0.00 | 0.38 | MM  | GTB-1 |
| chr22:22906450C>T       | IGLC3      | 0.00 | 0.22 | MM  | GTB-1 |
| chr22:23181880A>G       | BCR        | 0.00 | 0.50 | MM  | GTB-1 |
| chr22:25847582G>T       | MYO18B     | 0.31 | 0.00 | ALL | GTB-1 |
| chr2:140350736T>G       | LRP1B      | 0.00 | 0.44 | MM  | GTB-1 |
| chr2:1433446A>C         | TPO        | 0.00 | 0.19 | MM  | GTB-1 |
| chr2:151507978T>G       | NEB        | 0.00 | 0.55 | MM  | GTB-1 |
| chr2:189011673C>T       | COL3A1     | 0.00 | 0.45 | MM  | GTB-1 |
| chr2:189667824C>T       | ASNSD1     | 0.00 | 0.50 | MM  | GTB-1 |
| chr2:210608563A>G       | CPS1       | 0.00 | 0.42 | MM  | GTB-1 |
| chr2:213930040T>C       | SPAG16     | 0.00 | 0.51 | MM  | GTB-1 |
| chr2:236049145C>A       | AGAP1      | 0.00 | 0.51 | MM  | GTB-1 |
| chr2:94873535C>T        | TEKT4      | 0.52 | 0.00 | ALL | GTB-1 |
| chr3:1220705G>A         | CNTN6      | 0.00 | 0.24 | MM  | GTB-1 |
| chr3:123700905C>T       | MYLK       | 0.43 | 0.00 | ALL | GTB-1 |
| chr3:165039869T>C       | SI         | 0.00 | 0.42 | MM  | GTB-1 |

|                         |           |      |      |     |        |
|-------------------------|-----------|------|------|-----|--------|
| chr3:33604248T>G        | CLASP2    | 0.00 | 0.47 | MM  | GTB-1  |
| chr3:62516551T>A        | CADPS     | 0.00 | 0.50 | MM  | GTB-1  |
| chr3:64541473G>C        | ADAMTS9   | 0.00 | 0.60 | MM  | GTB-1  |
| chr4:105932717G>A       | NPNT      | 0.30 | 0.00 | ALL | GTB-1  |
| chr4:125452296G>A       | FAT4      | 0.00 | 0.45 | MM  | GTB-1  |
| chr4:158171275G>A       | FAM198B   | 0.00 | 0.47 | MM  | GTB-1  |
| chr4:168711715C>G       | PALLD     | 0.00 | 0.46 | MM  | GTB-1  |
| chr4:17886127G>A        | LCORL     | 0.00 | 0.50 | MM  | GTB-1  |
| chr4:184770243C>T       | ACSL1     | 0.00 | 0.33 | MM  | GTB-1  |
| chr4:4302866A>T         | ZBTB49    | 0.00 | 0.46 | MM  | GTB-1  |
| chr4:5468081C>T         | STK32B    | 0.00 | 0.21 | MM  | GTB-1  |
| chr4:71758159C>A        | GC        | 0.00 | 0.26 | MM  | GTB-1  |
| chr4:89927799G>T        | MMRN1     | 0.00 | 0.52 | MM  | GTB-1  |
| chr5:115163608C>A       | TRIM36    | 0.00 | 0.42 | MM  | GTB-1  |
| chr5:13867980G>T        | DNAH5     | 0.00 | 0.45 | MM  | GTB-1  |
| chr5:151855206C>T       | GLRA1     | 0.00 | 0.23 | MM  | GTB-1  |
| chr5:172339921A>G       | SH3PXD2B  | 0.00 | 0.50 | MM  | GTB-1  |
| chr5:172968585A>T       | RPL26L1   | 0.00 | 0.20 | MM  | GTB-1  |
| chr5:878399G>A          | BRD9      | 0.00 | 0.36 | MM  | GTB-1  |
| chr6:146399642G>A       | GRM1      | 0.00 | 0.46 | MM  | GTB-1  |
| chr6:152755303G>A       | VIP       | 0.00 | 0.43 | MM  | GTB-1  |
| chr6:156779208AGCCCCATC | ARID1B    | 0.00 | 0.34 | MM  | GTB-1  |
| chr6:156779225C>A       | ARID1B    | 0.00 | 0.43 | MM  | GTB-1  |
| chr6:29621303A>G        | GABBR1    | 0.00 | 0.20 | MM  | GTB-1  |
| chr6:31581728T>G        | LTB       | 0.00 | 0.53 | MM  | GTB-1  |
| chr6:75090126T>G        | COL12A1   | 0.00 | 0.46 | MM  | GTB-1  |
| chr6:75602444T>C        | SENP6     | 0.00 | 0.50 | MM  | GTB-1  |
| chr7:103575692G>A       | RELN      | 0.00 | 0.50 | MM  | GTB-1  |
| chr7:140781611C>T       | BRAF      | 0.00 | 0.24 | MM  | GTB-1  |
| chr7:151491038G>A       | RHEB      | 0.00 | 0.47 | MM  | GTB-1  |
| chr8:120283749C>A       | COL14A1   | 0.00 | 0.21 | MM  | GTB-1  |
| chr8:13567898A>T        | C8orf48   | 0.00 | 0.68 | MM  | GTB-1  |
| chr8:143043256G>A       | C8orf31   | 0.00 | 0.57 | MM  | GTB-1  |
| chr8:35750657G>A        | UNC5D     | 0.00 | 0.61 | MM  | GTB-1  |
| chr8:76854832T>C        | ZFHX4     | 0.00 | 0.67 | MM  | GTB-1  |
| chr8:80687429C>T        | ZNF704    | 0.00 | 0.29 | MM  | GTB-1  |
| chr8:80993159A>C        | PAG1      | 0.00 | 0.61 | MM  | GTB-1  |
| chr9:136940983G>A       | FBXW5     | 0.00 | 0.19 | MM  | GTB-1  |
| chr9:18706626C>G        | ADAMTSL1  | 0.00 | 0.57 | MM  | GTB-1  |
| chr9:35342297A>A        | UNC13B    | 0.00 | 0.37 | MM  | GTB-1  |
| chr9:36923357G>C        | PAX5      | 0.39 | 0.00 | ALL | GTB-1  |
| chr9:70347053A>AT       | SMC5      | 0.00 | 0.55 | MM  | GTB-1  |
| chr9:93259128G>A        | WNK2      | 0.00 | 0.47 | MM  | GTB-1  |
| chrX:106865769T>C       | TBC1D8B   | 0.00 | 0.98 | MM  | GTB-1  |
| chr11:6199819C>T        | OR52W1    | 0.39 | 0.00 | ALL | GTB-12 |
| chr11:62526024G>A       | AHNAK     | 0.33 | 0.00 | ALL | GTB-12 |
| chr11:70338423T>G       | PPFIA1    | 0.46 | 0.00 | ALL | GTB-12 |
| chr12:55320758G>T       | OR6C1     | 0.21 | 0.00 | ALL | GTB-12 |
| chr12:7190077C>G        | PEX5      | 0.26 | 0.00 | ALL | GTB-12 |
| chr13:20729170C>T       | EEF1AKMT1 | 0.36 | 0.00 | ALL | GTB-12 |
| chr14:100884395G>A      | RTL1      | 0.34 | 0.00 | ALL | GTB-12 |
| chr15:76995618G>A       | PSTPIP1   | 0.00 | 0.11 | MM  | GTB-12 |

|                       |               |      |      |     |        |
|-----------------------|---------------|------|------|-----|--------|
| chr16:30766502C>T     | RNF40         | 0.44 | 0.00 | ALL | GTB-12 |
| chr17:3648894G>T      | CTNS          | 0.33 | 0.00 | ALL | GTB-12 |
| chr17:37246849C>T     | ACACA         | 0.44 | 0.00 | ALL | GTB-12 |
| chr18:7012006C>T      | LAMA1         | 0.28 | 0.00 | ALL | GTB-12 |
| chr18:9208742A>G      | ANKRD12       | 0.00 | 0.10 | MM  | GTB-12 |
| chr19:31276959G>T     | TSHZ3         | 0.00 | 0.34 | MM  | GTB-12 |
| chr19:37388991CTTCT>C | ZNF527        | 0.30 | 0.00 | ALL | GTB-12 |
| chr19:39872621G>A     | FCGBP         | 0.35 | 0.00 | ALL | GTB-12 |
| chr19:46018300G>A     | PGLYRP1       | 0.31 | 0.00 | ALL | GTB-12 |
| chr20:63681224G>A     | TEL1-TNFRSF6I | 0.37 | 0.00 | ALL | GTB-12 |
| chr21:17547115G>A     | CXADR         | 0.34 | 0.00 | ALL | GTB-12 |
| chr22:45925333C>T     | WNT7B         | 0.36 | 0.00 | ALL | GTB-12 |
| chr2:43225265A>ACCCCG | ZFP36L2       | 0.32 | 0.00 | ALL | GTB-12 |
| chr2:43225266A>G      | ZFP36L2       | 0.34 | 0.00 | ALL | GTB-12 |
| chr4:152328232C>T     | FBXW7         | 0.28 | 0.00 | ALL | GTB-12 |
| chr4:3240043A>G       | HTT           | 0.31 | 0.00 | ALL | GTB-12 |
| chr5:131988583C>T     | AC026398.1    | 0.32 | 0.00 | ALL | GTB-12 |
| chr5:72461097C>T      | ZNF366        | 0.00 | 0.15 | MM  | GTB-12 |
| chr6:122781726C>G     | FABP7         | 0.28 | 0.00 | ALL | GTB-12 |
| chr6:4135526C>A       | C6orf201      | 0.27 | 0.00 | ALL | GTB-12 |
| chr6:78946040TAA>T    | PHIP          | 0.37 | 0.00 | ALL | GTB-12 |
| chr9:100513336A>C     | TMEFF1        | 0.00 | 0.25 | MM  | GTB-12 |
| chr9:125484550G>A     | MAPKAP1       | 0.00 | 0.15 | MM  | GTB-12 |
| chrX:106726694G>A     | RNF128        | 0.33 | 0.00 | ALL | GTB-12 |
| chrX:83509073C>T      | POU3F4        | 0.30 | 0.00 | ALL | GTB-12 |
| chr10:100479955C>T    | WNT8B         | 0.00 | 0.07 | MM  | GTB-7  |
| chr10:102065587C>T    | HPS6          | 0.00 | 0.07 | MM  | GTB-7  |
| chr10:124008704A>G    | CHST15        | 0.00 | 0.06 | MM  | GTB-7  |
| chr10:13971954C>A     | FRMD4A        | 0.00 | 0.09 | MM  | GTB-7  |
| chr10:14845413G>A     | HSPA14        | 0.00 | 0.08 | MM  | GTB-7  |
| chr10:68195499G>A     | MYPN          | 0.00 | 0.07 | MM  | GTB-7  |
| chr10:70888665G>T     | PCBD1         | 0.00 | 0.08 | MM  | GTB-7  |
| chr10:80280770G>A     | MAT1A         | 0.00 | 0.06 | MM  | GTB-7  |
| chr10:80588655G>A     | SH2D4B        | 0.00 | 0.05 | MM  | GTB-7  |
| chr10:91630844G>A     | PPP1R3C       | 0.00 | 0.07 | MM  | GTB-7  |
| chr10:93515457A>G     | CEP55         | 0.44 | 0.00 | ALL | GTB-7  |
| chr10:99420683G>A     | GOT1          | 0.00 | 0.10 | MM  | GTB-7  |
| chr11:10628819G>A     | MRVI1         | 0.00 | 0.05 | MM  | GTB-7  |
| chr11:113236304G>A    | NCAM1         | 0.81 | 0.00 | ALL | GTB-7  |
| chr11:114250367C>T    | ZBTB16        | 0.06 | 0.00 | ALL | GTB-7  |
| chr11:118902504C>T    | CXCR5         | 0.00 | 0.07 | MM  | GTB-7  |
| chr11:119340373G>A    | C1QTNF5       | 0.06 | 0.00 | ALL | GTB-7  |
| chr11:123726637C>T    | ZNF202        | 0.00 | 0.08 | MM  | GTB-7  |
| chr11:124675413G>A    | SPA17         | 0.00 | 0.10 | MM  | GTB-7  |
| chr11:18400908C>T     | LDHA          | 0.00 | 0.09 | MM  | GTB-7  |
| chr11:406196G>A       | SIGIRR        | 0.00 | 0.08 | MM  | GTB-7  |
| chr11:43443496G>A     | TTC17         | 0.00 | 0.06 | MM  | GTB-7  |
| chr11:46705422C>T     | ZNF408        | 0.00 | 0.05 | MM  | GTB-7  |
| chr11:5508941C>A      | UBQLN3        | 0.35 | 0.00 | ALL | GTB-7  |
| chr11:62148815G>A     | INCENP        | 0.00 | 0.07 | MM  | GTB-7  |
| chr11:64285685T>G     | BAD           | 0.00 | 0.07 | MM  | GTB-7  |
| chr11:72097623G>T     | LAMTOR1       | 0.00 | 0.13 | MM  | GTB-7  |

|                    |            |      |      |     |       |
|--------------------|------------|------|------|-----|-------|
| chr11:83248391C>A  | ANKRD42    | 0.00 | 0.10 | MM  | GTB-7 |
| chr12:101737233C>T | SYCP3      | 0.00 | 0.12 | MM  | GTB-7 |
| chr12:105233129A>G | APPL2      | 0.00 | 0.07 | MM  | GTB-7 |
| chr12:109287957G>A | FOXN4      | 0.00 | 0.08 | MM  | GTB-7 |
| chr12:112108858G>T | NAA25      | 0.00 | 0.06 | MM  | GTB-7 |
| chr12:12095596C>G  | BCL2L14    | 0.00 | 0.09 | MM  | GTB-7 |
| chr12:26069812A>C  | RASSF8     | 0.00 | 0.16 | MM  | GTB-7 |
| chr12:26070505G>A  | RASSF8     | 0.00 | 0.19 | MM  | GTB-7 |
| chr12:47758822G>C  | RAPGEF3    | 0.00 | 0.06 | MM  | GTB-7 |
| chr12:47993486G>A  | COL2A1     | 0.00 | 0.12 | MM  | GTB-7 |
| chr12:48340521AC>A | ZNF641     | 0.00 | 0.15 | MM  | GTB-7 |
| chr12:49046175C>T  | KMT2D      | 0.39 | 0.00 | ALL | GTB-7 |
| chr12:49543474C>T  | KCNH3      | 0.00 | 0.05 | MM  | GTB-7 |
| chr12:56164425G>A  | MYL6       | 0.00 | 0.05 | MM  | GTB-7 |
| chr12:57204478G>A  | LRP1       | 0.00 | 0.06 | MM  | GTB-7 |
| chr12:6235914G>A   | CD9        | 0.00 | 0.13 | MM  | GTB-7 |
| chr12:6236033C>T   | CD9        | 0.00 | 0.06 | MM  | GTB-7 |
| chr12:6644562G>T   | ACRBP      | 0.00 | 0.07 | MM  | GTB-7 |
| chr12:6850892G>A   | CDCA3      | 0.00 | 0.06 | MM  | GTB-7 |
| chr13:114056664C>T | RASA3      | 0.00 | 0.10 | MM  | GTB-7 |
| chr13:54441310C>T  | RPL13AP25  | 0.88 | 0.00 | ALL | GTB-7 |
| chr14:102213827G>A | WDR20      | 0.00 | 0.05 | MM  | GTB-7 |
| chr14:104026927C>T | TDRD9      | 0.00 | 0.05 | MM  | GTB-7 |
| chr14:105155786C>T | JAG2       | 0.00 | 0.05 | MM  | GTB-7 |
| chr14:105219034C>T | BRF1       | 0.00 | 0.10 | MM  | GTB-7 |
| chr14:105391736C>T | PACS2      | 0.00 | 0.06 | MM  | GTB-7 |
| chr14:34539569C>T  | EAPP       | 0.00 | 0.06 | MM  | GTB-7 |
| chr14:50108690C>T  | VCPKMT     | 0.00 | 0.12 | MM  | GTB-7 |
| chr14:64441409C>T  | MTHFD1     | 0.00 | 0.08 | MM  | GTB-7 |
| chr14:89924303C>T  | EFCAB11    | 0.00 | 0.09 | MM  | GTB-7 |
| chr15:40296606C>T  | PLCB2      | 0.00 | 0.09 | MM  | GTB-7 |
| chr15:43377864C>T  | TUBGCP4    | 0.00 | 0.06 | MM  | GTB-7 |
| chr15:71848855C>T  | MYO9A      | 0.00 | 0.09 | MM  | GTB-7 |
| chr15:72168957C>T  | GRAMD2A    | 0.00 | 0.08 | MM  | GTB-7 |
| chr15:73751054C>T  | INSYN1     | 0.00 | 0.07 | MM  | GTB-7 |
| chr15:74755085T>C  | CYP1A2     | 0.00 | 0.05 | MM  | GTB-7 |
| chr15:78131180C>T  | CIB2       | 0.00 | 0.07 | MM  | GTB-7 |
| chr15:89322015G>A  | POLG       | 0.00 | 0.06 | MM  | GTB-7 |
| chr16:12909391G>C  | SHISA9     | 0.00 | 0.10 | MM  | GTB-7 |
| chr16:1362128C>A   | GNPTG      | 0.00 | 0.05 | MM  | GTB-7 |
| chr16:17470652C>T  | XYLT1      | 0.00 | 0.06 | MM  | GTB-7 |
| chr16:1959678G>A   | NDUFB10    | 0.00 | 0.06 | MM  | GTB-7 |
| chr16:25169161G>A  | LCMT1      | 0.00 | 0.08 | MM  | GTB-7 |
| chr16:27067422C>T  | AC092725.1 | 0.00 | 0.06 | MM  | GTB-7 |
| chr16:55327631G>A  | IRX6       | 0.00 | 0.05 | MM  | GTB-7 |
| chr16:57643973G>A  | ADGRG1     | 0.00 | 0.16 | MM  | GTB-7 |
| chr16:67238416G>A  | FHOD1      | 0.00 | 0.05 | MM  | GTB-7 |
| chr16:67936460G>A  | PSMB10     | 0.00 | 0.05 | MM  | GTB-7 |
| chr16:71684508C>T  | PHLPP2     | 0.00 | 0.07 | MM  | GTB-7 |
| chr16:83915895C>T  | MLYCD      | 0.00 | 0.07 | MM  | GTB-7 |
| chr16:88749468G>A  | PIEZO1     | 0.00 | 0.06 | MM  | GTB-7 |
| chr17:16353297C>T  | CENPV      | 0.00 | 0.06 | MM  | GTB-7 |



|                      |            |      |      |     |       |
|----------------------|------------|------|------|-----|-------|
| chr17:20205812G>A    | SPECC1     | 0.00 | 0.09 | MM  | GTB-7 |
| chr17:2690671C>T     | CLUH       | 0.00 | 0.06 | MM  | GTB-7 |
| chr17:38510650C>T    | ARHGAP23   | 0.00 | 0.09 | MM  | GTB-7 |
| chr17:42850330C>T    | AOC2       | 0.00 | 0.05 | MM  | GTB-7 |
| chr17:44383546C>T    | ITGA2B     | 0.00 | 0.07 | MM  | GTB-7 |
| chr17:53823602T>A    | KIF2B      | 0.00 | 0.07 | MM  | GTB-7 |
| chr17:58514381G>A    | MTMR4      | 0.00 | 0.06 | MM  | GTB-7 |
| chr17:63524311G>A    | AC113554.1 | 0.00 | 0.08 | MM  | GTB-7 |
| chr17:7076785C>T     | CLEC10A    | 0.00 | 0.08 | MM  | GTB-7 |
| chr17:75731246C>T    | ITGB4      | 0.00 | 0.05 | MM  | GTB-7 |
| chr17:76019558G>A    | EVPL       | 0.00 | 0.06 | MM  | GTB-7 |
| chr17:76474730C>T    | RHBDF2     | 0.00 | 0.10 | MM  | GTB-7 |
| chr17:77214492A>C    | SEC14L1    | 0.00 | 0.09 | MM  | GTB-7 |
| chr17:81165963G>A    | PVALEF     | 0.00 | 0.06 | MM  | GTB-7 |
| chr17:8828860G>A     | PIK3R6     | 0.00 | 0.06 | MM  | GTB-7 |
| chr18:35140319G>A    | MAPRE2     | 0.00 | 0.05 | MM  | GTB-7 |
| chr18:46253735TCTG>T | C18orf25   | 0.00 | 0.07 | MM  | GTB-7 |
| chr19:1053526G>A     | ABCA7      | 0.00 | 0.06 | MM  | GTB-7 |
| chr19:1510933G>A     | ADAMTSL5   | 0.00 | 0.07 | MM  | GTB-7 |
| chr19:15451852C>T    | RASAL3     | 0.05 | 0.00 | ALL | GTB-7 |
| chr19:1621163G>A     | TCF3       | 0.00 | 0.05 | MM  | GTB-7 |
| chr19:17306274C>A    | MRPL34     | 0.00 | 0.07 | MM  | GTB-7 |
| chr19:17540411C>T    | FAM129C    | 0.00 | 0.07 | MM  | GTB-7 |
| chr19:17658090C>T    | UNC13A     | 0.00 | 0.07 | MM  | GTB-7 |
| chr19:18388657C>T    | GDF15      | 0.00 | 0.05 | MM  | GTB-7 |
| chr19:18668646G>A    | KLHL26     | 0.00 | 0.06 | MM  | GTB-7 |
| chr19:23136032C>T    | ZNF730     | 0.00 | 0.12 | MM  | GTB-7 |
| chr19:3029133G>A     | TLE2       | 0.00 | 0.07 | MM  | GTB-7 |
| chr19:32598283C>T    | ANKRD27    | 0.00 | 0.07 | MM  | GTB-7 |
| chr19:35781215C>T    | ARHGAP33   | 0.00 | 0.07 | MM  | GTB-7 |
| chr19:38723635C>T    | ACTN4      | 0.00 | 0.07 | MM  | GTB-7 |
| chr19:42249018G>A    | ERF        | 0.00 | 0.05 | MM  | GTB-7 |
| chr19:44087214G>A    | ZNF284     | 0.00 | 0.09 | MM  | GTB-7 |
| chr19:44512058G>A    | CEACAM20   | 0.00 | 0.10 | MM  | GTB-7 |
| chr19:49599844C>T    | PRR12      | 0.00 | 0.06 | MM  | GTB-7 |
| chr19:52799730G>C    | ZNF28      | 0.00 | 0.13 | MM  | GTB-7 |
| chr19:5653403G>A     | SAFB       | 0.00 | 0.07 | MM  | GTB-7 |
| chr19:5778633C>T     | CATSPERD   | 0.00 | 0.05 | MM  | GTB-7 |
| chr19:7535923C>T     | MCOLN1     | 0.00 | 0.06 | MM  | GTB-7 |
| chr19:8117283C>T     | FBN3       | 0.00 | 0.08 | MM  | GTB-7 |
| chr1:100352622G>C    | CDC14A     | 0.00 | 0.06 | MM  | GTB-7 |
| chr1:12578718C>T     | DHRS3      | 0.00 | 0.10 | MM  | GTB-7 |
| chr1:151045003G>A    | BNIP1      | 0.00 | 0.08 | MM  | GTB-7 |
| chr1:151574969G>A    | TUFT1      | 0.00 | 0.06 | MM  | GTB-7 |
| chr1:156670327C>T    | NES        | 0.00 | 0.07 | MM  | GTB-7 |
| chr1:201199352G>A    | IGFN1      | 0.00 | 0.07 | MM  | GTB-7 |
| chr1:213997276G>A    | PROX1      | 0.00 | 0.06 | MM  | GTB-7 |
| chr1:21878615G>A     | HSPG2      | 0.00 | 0.06 | MM  | GTB-7 |
| chr1:222989404G>A    | DISP1      | 0.00 | 0.08 | MM  | GTB-7 |
| chr1:225043032C>A    | DNAH14     | 0.00 | 0.11 | MM  | GTB-7 |
| chr1:228275803G>A    | OBSCN      | 0.00 | 0.06 | MM  | GTB-7 |
| chr1:228494212CT>C   | RNF187     | 0.00 | 0.06 | MM  | GTB-7 |

|                   |           |      |      |     |       |
|-------------------|-----------|------|------|-----|-------|
| chr1:234478549C>T | TARBP1    | 0.00 | 0.05 | MM  | GTB-7 |
| chr1:235712647T>C | LYST      | 0.00 | 0.07 | MM  | GTB-7 |
| chr1:26053915C>T  | TRIM63    | 0.00 | 0.07 | MM  | GTB-7 |
| chr1:26370675G>A  | ZNF683    | 0.00 | 0.06 | MM  | GTB-7 |
| chr1:27292239C>A  | WDTC1     | 0.00 | 0.07 | MM  | GTB-7 |
| chr1:30733912G>A  | LAPTM5    | 0.00 | 0.06 | MM  | GTB-7 |
| chr1:34794489C>T  | GJA4      | 0.00 | 0.07 | MM  | GTB-7 |
| chr1:35011002G>A  | ZMYM6     | 0.00 | 0.06 | MM  | GTB-7 |
| chr1:39571189C>T  | PABPC4    | 0.00 | 0.05 | MM  | GTB-7 |
| chr1:67833608T>G  | GNG12     | 0.00 | 0.07 | MM  | GTB-7 |
| chr1:77283101A>G  | AK5       | 0.00 | 0.05 | MM  | GTB-7 |
| chr20:23354361G>A | NXT1      | 0.00 | 0.05 | MM  | GTB-7 |
| chr20:32432908G>A | ASXL1     | 0.00 | 0.05 | MM  | GTB-7 |
| chr20:38988819G>A | DHX35     | 0.00 | 0.07 | MM  | GTB-7 |
| chr20:46545694C>T | OCSTAMP   | 0.00 | 0.09 | MM  | GTB-7 |
| chr20:48692719C>T | PREX1     | 0.00 | 0.08 | MM  | GTB-7 |
| chr20:56453001G>A | CASS4     | 0.00 | 0.11 | MM  | GTB-7 |
| chr20:63568912G>A | HELZ2     | 0.00 | 0.07 | MM  | GTB-7 |
| chr20:63735465G>A | SLC2A4RG  | 0.00 | 0.06 | MM  | GTB-7 |
| chr21:17567621A>G | CXADR     | 0.00 | 0.23 | MM  | GTB-7 |
| chr21:26170617G>A | APP       | 0.00 | 0.07 | MM  | GTB-7 |
| chr21:34099516T>C | SLC5A3    | 0.00 | 0.23 | MM  | GTB-7 |
| chr21:37197580G>T | TTC3      | 0.00 | 0.08 | MM  | GTB-7 |
| chr21:39188336T>C | PSMG1     | 0.00 | 0.18 | MM  | GTB-7 |
| chr21:39189086G>T | BRWD1     | 0.00 | 0.23 | MM  | GTB-7 |
| chr21:41741204C>T | RIPK4     | 0.00 | 0.06 | MM  | GTB-7 |
| chr21:42575844A>G | SLC37A1   | 0.00 | 0.15 | MM  | GTB-7 |
| chr21:42768846C>T | PDE9A     | 0.00 | 0.09 | MM  | GTB-7 |
| chr21:42879214G>C | WDR4      | 0.00 | 0.05 | MM  | GTB-7 |
| chr21:45477923G>A | COL18A1   | 0.00 | 0.10 | MM  | GTB-7 |
| chr21:46207557C>T | LSS       | 0.00 | 0.06 | MM  | GTB-7 |
| chr22:20139199C>T | ZDHHC8    | 0.00 | 0.07 | MM  | GTB-7 |
| chr22:20712412G>A | PI4KA     | 0.00 | 0.12 | MM  | GTB-7 |
| chr22:21959457A>C | TOP3B     | 0.00 | 0.09 | MM  | GTB-7 |
| chr22:29216492G>A | EMID1     | 0.00 | 0.07 | MM  | GTB-7 |
| chr22:30932658C>T | MORC2     | 0.00 | 0.08 | MM  | GTB-7 |
| chr22:30939620C>T | MORC2     | 0.00 | 0.07 | MM  | GTB-7 |
| chr22:31463712C>T | EIF4ENIF1 | 0.00 | 0.06 | MM  | GTB-7 |
| chr22:35332985G>T | TOM1      | 0.00 | 0.08 | MM  | GTB-7 |
| chr22:36284211C>T | MYH9      | 0.00 | 0.05 | MM  | GTB-7 |
| chr22:37648352G>A | SH3BP1    | 0.00 | 0.05 | MM  | GTB-7 |
| chr22:38169388G>A | PLA2G6    | 0.00 | 0.06 | MM  | GTB-7 |
| chr22:38294503C>T | CSNK1E    | 0.00 | 0.05 | MM  | GTB-7 |
| chr22:39433501C>T | TAB1      | 0.00 | 0.07 | MM  | GTB-7 |
| chr22:41237830G>A | CHADL     | 0.00 | 0.07 | MM  | GTB-7 |
| chr22:42126611C>G | CYP2D6    | 0.00 | 0.13 | MM  | GTB-7 |
| chr22:45525625C>T | FBLN1     | 0.00 | 0.05 | MM  | GTB-7 |
| chr22:48646641G>T | FAM19A5   | 0.79 | 0.00 | ALL | GTB-7 |
| chr22:50462086C>T | SBF1      | 0.00 | 0.07 | MM  | GTB-7 |
| chr2:109432541G>A | SH3RF3    | 0.00 | 0.06 | MM  | GTB-7 |
| chr2:127257609C>T | ERCC3     | 0.00 | 0.06 | MM  | GTB-7 |
| chr2:178702565C>T | TTN       | 0.00 | 0.08 | MM  | GTB-7 |

|                     |           |      |      |     |       |
|---------------------|-----------|------|------|-----|-------|
| chr2:178799668C>T   | TTN       | 0.00 | 0.06 | MM  | GTB-7 |
| chr2:227718030G>A   | SLC19A3   | 0.00 | 0.08 | MM  | GTB-7 |
| chr2:229836947C>T   | TRIP12    | 0.00 | 0.05 | MM  | GTB-7 |
| chr2:232633662C>T   | EFHD1     | 0.00 | 0.08 | MM  | GTB-7 |
| chr2:233034286G>A   | NEU2      | 0.00 | 0.06 | MM  | GTB-7 |
| chr2:233319591G>GA  | SAG       | 0.00 | 0.11 | MM  | GTB-7 |
| chr2:236324694C>T   | IQCA1     | 0.00 | 0.06 | MM  | GTB-7 |
| chr2:241601973C>T   | THAP4     | 0.00 | 0.05 | MM  | GTB-7 |
| chr2:27238595G>A    | CAD       | 0.00 | 0.07 | MM  | GTB-7 |
| chr2:27496964G>A    | GCKR      | 0.00 | 0.11 | MM  | GTB-7 |
| chr2:31403097C>T    | XDH       | 0.00 | 0.05 | MM  | GTB-7 |
| chr2:56183699G>A    | CCDC85A   | 0.00 | 0.06 | MM  | GTB-7 |
| chr2:65311444G>A    | SPRED2    | 0.00 | 0.10 | MM  | GTB-7 |
| chr2:73080442C>T    | RAB11FIP5 | 0.00 | 0.05 | MM  | GTB-7 |
| chr2:73081174A>G    | RAB11FIP5 | 0.00 | 0.05 | MM  | GTB-7 |
| chr2:73734536C>T    | TPRKB     | 0.00 | 0.08 | MM  | GTB-7 |
| chr2:74423920G>A    | WDR54     | 0.00 | 0.06 | MM  | GTB-7 |
| chr3:111193316C>A   | NECTIN3   | 0.00 | 0.09 | MM  | GTB-7 |
| chr3:11379990C>T    | ATG7      | 0.00 | 0.06 | MM  | GTB-7 |
| chr3:113960203A>G   | ZDHHC23   | 0.00 | 0.08 | MM  | GTB-7 |
| chr3:11601894C>T    | VGLL4     | 0.00 | 0.06 | MM  | GTB-7 |
| chr3:120602092C>T   | NDUFB4    | 0.00 | 0.05 | MM  | GTB-7 |
| chr3:121727000C>T   | GOLGB1    | 0.00 | 0.13 | MM  | GTB-7 |
| chr3:127710609G>A   | MGLL      | 0.00 | 0.06 | MM  | GTB-7 |
| chr3:130894151C>T   | ATP2C1    | 0.00 | 0.12 | MM  | GTB-7 |
| chr3:141432148G>A   | ZBTB38    | 0.00 | 0.07 | MM  | GTB-7 |
| chr3:156457320C>CTT | KCNAB1    | 0.00 | 0.15 | MM  | GTB-7 |
| chr3:197119507G>A   | DLG1      | 0.00 | 0.05 | MM  | GTB-7 |
| chr3:35685256A>G    | ARPP21    | 0.00 | 0.13 | MM  | GTB-7 |
| chr3:48584045C>T    | COL7A1    | 0.00 | 0.06 | MM  | GTB-7 |
| chr4:143699439C>T   | FREM3     | 0.00 | 0.07 | MM  | GTB-7 |
| chr4:148445849C>T   | NR3C2     | 0.00 | 0.08 | MM  | GTB-7 |
| chr4:15003081C>T    | CPEB2     | 0.00 | 0.06 | MM  | GTB-7 |
| chr4:17582342G>A    | LAP3      | 0.00 | 0.07 | MM  | GTB-7 |
| chr4:1822269G>A     | LETM1     | 0.00 | 0.05 | MM  | GTB-7 |
| chr4:1984102G>A     | NSD2      | 0.00 | 0.06 | MM  | GTB-7 |
| chr4:25365396G>A    | ZCCHC4    | 0.00 | 0.12 | MM  | GTB-7 |
| chr4:56324129G>A    | KIAA1211  | 0.00 | 0.08 | MM  | GTB-7 |
| chr4:78267256C>T    | FRAS1     | 0.00 | 0.07 | MM  | GTB-7 |
| chr4:8581279G>A     | GPR78     | 0.00 | 0.07 | MM  | GTB-7 |
| chr4:99204711G>A    | ADH6      | 0.00 | 0.19 | MM  | GTB-7 |
| chr5:123402015C>T   | CEP120    | 0.25 | 0.00 | ALL | GTB-7 |
| chr5:132824753C>T   | SHROOM1   | 0.00 | 0.09 | MM  | GTB-7 |
| chr5:134578509C>T   | JADE2     | 0.00 | 0.06 | MM  | GTB-7 |
| chr5:134874441C>T   | TXNDC15   | 0.00 | 0.06 | MM  | GTB-7 |
| chr5:134874494C>T   | TXNDC15   | 0.00 | 0.07 | MM  | GTB-7 |
| chr5:138931688G>A   | CTNNA1    | 0.00 | 0.06 | MM  | GTB-7 |
| chr5:140787397C>T   | PCDHA1    | 0.00 | 0.06 | MM  | GTB-7 |
| chr5:141393113G>A   | PCDHGA2   | 0.00 | 0.06 | MM  | GTB-7 |
| chr5:141649903C>T   | FCHSD1    | 0.00 | 0.06 | MM  | GTB-7 |
| chr5:141941971G>A   | DELE1     | 0.00 | 0.12 | MM  | GTB-7 |
| chr5:14465626G>A    | TRIO      | 0.00 | 0.06 | MM  | GTB-7 |

|                   |            |      |      |     |       |
|-------------------|------------|------|------|-----|-------|
| chr5:154795191G>A | LARP1      | 0.00 | 0.14 | MM  | GTB-7 |
| chr5:157477625C>T | NIPAL4     | 0.00 | 0.06 | MM  | GTB-7 |
| chr5:171876433G>A | FBXW11     | 0.00 | 0.06 | MM  | GTB-7 |
| chr5:175522392C>T | SFXN1      | 0.00 | 0.06 | MM  | GTB-7 |
| chr5:176384092G>A | HIGD2A     | 0.00 | 0.12 | MM  | GTB-7 |
| chr5:66788712C>T  | MAST4      | 0.00 | 0.05 | MM  | GTB-7 |
| chr5:71510048G>A  | BDP1       | 0.00 | 0.07 | MM  | GTB-7 |
| chr6:110431268G>A | SLC22A16   | 0.00 | 0.07 | MM  | GTB-7 |
| chr6:110875171G>A | AMD1       | 0.00 | 0.05 | MM  | GTB-7 |
| chr6:111575687G>A | TRAF3IP2   | 0.00 | 0.06 | MM  | GTB-7 |
| chr6:131808078G>A | ENPP1      | 0.00 | 0.07 | MM  | GTB-7 |
| chr6:133980115A>G | TBPL1      | 0.83 | 0.00 | ALL | GTB-7 |
| chr6:148544293C>T | SASH1      | 0.00 | 0.08 | MM  | GTB-7 |
| chr6:152483120C>T | SYNE1      | 0.00 | 0.06 | MM  | GTB-7 |
| chr6:154810164G>A | SCAF8      | 0.00 | 0.05 | MM  | GTB-7 |
| chr6:15487418G>A  | JARID2     | 0.00 | 0.06 | MM  | GTB-7 |
| chr6:2962033T>G   | SERPINB6   | 0.00 | 0.07 | MM  | GTB-7 |
| chr6:35469148C>T  | RPL10A     | 0.00 | 0.13 | MM  | GTB-7 |
| chr6:36721641C>T  | RAB44      | 0.00 | 0.05 | MM  | GTB-7 |
| chr6:36978558G>A  | MTCH1      | 0.00 | 0.05 | MM  | GTB-7 |
| chr6:43052354G>A  | MRPL2      | 0.00 | 0.08 | MM  | GTB-7 |
| chr6:44232015C>T  | SLC29A1    | 0.00 | 0.10 | MM  | GTB-7 |
| chr6:73452136C>T  | CGAS       | 0.00 | 0.07 | MM  | GTB-7 |
| chr6:98898945T>C  | FBXL4      | 0.00 | 0.12 | MM  | GTB-7 |
| chr7:102446642C>T | ORAI2      | 0.00 | 0.05 | MM  | GTB-7 |
| chr7:127590104G>A | ARF5       | 0.00 | 0.05 | MM  | GTB-7 |
| chr7:128350988G>A | PRRT4      | 0.00 | 0.06 | MM  | GTB-7 |
| chr7:132973324C>A | CHCHD3     | 0.00 | 0.09 | MM  | GTB-7 |
| chr7:140721227T>C | NDUFB2     | 0.00 | 0.15 | MM  | GTB-7 |
| chr7:143397306C>T | EPHA1      | 0.00 | 0.05 | MM  | GTB-7 |
| chr7:148415425G>T | CNTNAP2    | 0.00 | 0.07 | MM  | GTB-7 |
| chr7:149104244C>T | ZNF425     | 0.00 | 0.05 | MM  | GTB-7 |
| chr7:3301823C>T   | SDK1       | 0.00 | 0.06 | MM  | GTB-7 |
| chr7:4267901G>A   | SDK1       | 0.00 | 0.11 | MM  | GTB-7 |
| chr7:5321098C>T   | TNRC18     | 0.00 | 0.08 | MM  | GTB-7 |
| chr8:101692328C>T | NCALD      | 0.00 | 0.09 | MM  | GTB-7 |
| chr8:104497971C>T | LRP12      | 0.00 | 0.09 | MM  | GTB-7 |
| chr8:10531479C>T  | PRSS55     | 0.00 | 0.06 | MM  | GTB-7 |
| chr8:120247677G>A | COL14A1    | 0.00 | 0.07 | MM  | GTB-7 |
| chr8:142273602T>C | TSNARE1    | 0.00 | 0.09 | MM  | GTB-7 |
| chr8:144311817G>A | HSF1       | 0.06 | 0.00 | ALL | GTB-7 |
| chr8:22581456G>A  | PDLIM2     | 0.00 | 0.06 | MM  | GTB-7 |
| chr8:27871532T>G  | SCARA5     | 0.00 | 0.14 | MM  | GTB-7 |
| chr8:86402037G>A  | WWP1       | 0.00 | 0.10 | MM  | GTB-7 |
| chr9:121341390C>T | STOM       | 0.00 | 0.07 | MM  | GTB-7 |
| chr9:123362873C>T | CRB2       | 0.00 | 0.05 | MM  | GTB-7 |
| chr9:128345234G>T | SLC27A4    | 0.00 | 0.06 | MM  | GTB-7 |
| chr9:131061088C>T | LAMC3      | 0.00 | 0.06 | MM  | GTB-7 |
| chr9:131475609G>A | PRRC2B     | 0.00 | 0.06 | MM  | GTB-7 |
| chr9:132990882G>A | GFI1B      | 0.00 | 0.06 | MM  | GTB-7 |
| chr9:133110418C>T | AL162417.1 | 0.00 | 0.06 | MM  | GTB-7 |
| chr9:134427014G>A | RXRA       | 0.00 | 0.25 | MM  | GTB-7 |

|                        |            |      |      |     |       |
|------------------------|------------|------|------|-----|-------|
| chr9:134753886G>A      | COL5A1     | 0.00 | 0.08 | MM  | GTB-7 |
| chr9:136226825C>T      | QSOX2      | 0.00 | 0.06 | MM  | GTB-7 |
| chr9:137161966G>A      | GRIN1      | 0.00 | 0.06 | MM  | GTB-7 |
| chr9:137220539C>T      | CYSRT1     | 0.00 | 0.06 | MM  | GTB-7 |
| chr9:27529822G>A       | MOB3B      | 0.00 | 0.06 | MM  | GTB-7 |
| chr9:27529865C>T       | MOB3B      | 0.00 | 0.06 | MM  | GTB-7 |
| chr9:35689173C>T       | TPM2       | 0.00 | 0.05 | MM  | GTB-7 |
| chr9:36080630G>A       | RECK       | 0.00 | 0.11 | MM  | GTB-7 |
| chr9:92047228G>A       | SPTLC1     | 0.00 | 0.05 | MM  | GTB-7 |
| chr9:94084555C>T       | PTPDC1     | 0.00 | 0.05 | MM  | GTB-7 |
| chrX:101231680C>T      | DRP2       | 0.00 | 0.10 | MM  | GTB-7 |
| chrX:105822852G>A      | NRK        | 0.00 | 0.05 | MM  | GTB-7 |
| chrX:119629466C>T      | 6-Sep      | 0.00 | 0.05 | MM  | GTB-7 |
| chrX:147981592C>T      | FMR1NB     | 0.00 | 0.09 | MM  | GTB-7 |
| chrX:154353415G>A      | FLNA       | 0.00 | 0.11 | MM  | GTB-7 |
| chrX:16828144G>A       | TXLNG      | 0.00 | 0.10 | MM  | GTB-7 |
| chrX:47245061G>A       | USP11      | 0.00 | 0.05 | MM  | GTB-7 |
| chrX:53248236G>A       | IQSEC2     | 0.00 | 0.11 | MM  | GTB-7 |
| chrX:72572059C>T       | AL133500.1 | 0.00 | 0.12 | MM  | GTB-7 |
| chrX:85067218G>A       | APOOL      | 0.40 | 0.00 | ALL | GTB-7 |
| chr10:102066734GCTCA>G | HPS6       | 0.23 | 0.00 | ALL | GTB-3 |
| chr10:133270384C>G     | ADAM8      | 0.31 | 0.00 | ALL | GTB-3 |
| chr10:21759621A>T      | DNAJC1     | 0.26 | 0.00 | ALL | GTB-3 |
| chr10:79349106G>T      | PPIF       | 0.26 | 0.00 | ALL | GTB-3 |
| chr10:96623561T>A      | PIK3AP1    | 0.21 | 0.00 | ALL | GTB-3 |
| chr11:119015332C>T     | CCDC84     | 0.00 | 0.07 | MM  | GTB-3 |
| chr11:120125754C>A     | TRIM29     | 0.00 | 0.06 | MM  | GTB-3 |
| chr11:130673014T>G     | C11orf44   | 0.07 | 0.00 | ALL | GTB-3 |
| chr11:59422022C>T      | OR5A2      | 0.36 | 0.00 | ALL | GTB-3 |
| chr11:64224774G>A      | NUDT22     | 0.41 | 0.00 | ALL | GTB-3 |
| chr11:67302189GC>G     | ANKRD13D   | 0.39 | 0.00 | ALL | GTB-3 |
| chr11:85685510G>A      | CCDC89     | 0.00 | 0.59 | MM  | GTB-3 |
| chr11:89875856C>T      | TRIM64B    | 0.16 | 0.00 | ALL | GTB-3 |
| chr11:93784465GT>G     | MED17      | 0.00 | 0.17 | MM  | GTB-3 |
| chr12:13090649T>C      | GSG1       | 0.00 | 0.47 | MM  | GTB-3 |
| chr12:25227341T>G      | KRAS       | 0.00 | 0.35 | MM  | GTB-3 |
| chr12:54281806T>C      | CBX5       | 0.24 | 0.00 | ALL | GTB-3 |
| chr12:57234154A>G      | NDUFA4L2   | 0.35 | 0.00 | ALL | GTB-3 |
| chr12:66456153T>C      | GRIP1      | 0.46 | 0.00 | ALL | GTB-3 |
| chr12:6772838C>G       | LAG3       | 0.36 | 0.00 | ALL | GTB-3 |
| chr12:81445691C>A      | PPFIA2     | 0.00 | 0.54 | MM  | GTB-3 |
| chr13:108793643A>T     | MYO16      | 0.00 | 0.34 | MM  | GTB-3 |
| chr13:28427288G>A      | FLT1       | 0.00 | 0.09 | MM  | GTB-3 |
| chr13:40757049T>C      | MRPS31     | 0.38 | 0.00 | ALL | GTB-3 |
| chr13:42187076C>T      | DGKH       | 0.00 | 0.19 | MM  | GTB-3 |
| chr13:48380215T>C      | RB1        | 0.00 | 0.43 | MM  | GTB-3 |
| chr14:104954285G>A     | AHNAK2     | 0.38 | 0.00 | ALL | GTB-3 |
| chr14:21391034C>T      | CHD8       | 0.33 | 0.00 | ALL | GTB-3 |
| chr14:36666497G>T      | PAX9       | 0.05 | 0.00 | ALL | GTB-3 |
| chr14:50322602C>A      | DMAC2L     | 0.00 | 0.43 | MM  | GTB-3 |
| chr14:52707228C>T      | PSMC6      | 0.24 | 0.00 | ALL | GTB-3 |
| chr15:40844987G>A      | SPINT1     | 0.00 | 0.59 | MM  | GTB-3 |

|                         |            |      |      |     |       |
|-------------------------|------------|------|------|-----|-------|
| chr15:42690859C>G       | STARD9     | 0.68 | 0.00 | ALL | GTB-3 |
| chr15:43154870G>A       | TMEM62     | 0.56 | 0.00 | ALL | GTB-3 |
| chr15:45131972C>A       | DUOX1      | 0.00 | 0.23 | MM  | GTB-3 |
| chr15:51474460G>A       | DMXL2      | 0.00 | 0.15 | MM  | GTB-3 |
| chr16:20587931G>A       | AC141273.1 | 0.66 | 0.00 | ALL | GTB-3 |
| chr16:28833257G>A       | ATXN2L     | 0.00 | 0.05 | MM  | GTB-3 |
| chr16:32879580G>A       | SLC6A10P   | 0.67 | 0.00 | ALL | GTB-3 |
| chr16:60359340C>T       | NPAP1L     | 0.64 | 0.00 | ALL | GTB-3 |
| chr16:70251726C>G       | AARS       | 0.67 | 0.00 | ALL | GTB-3 |
| chr16:81151869T>C       | PKD1L2     | 0.60 | 0.00 | ALL | GTB-3 |
| chr16:86510641G>T       | FOXF1      | 0.63 | 0.00 | ALL | GTB-3 |
| chr17:39792882AAAAC>A   | IKZF3      | 0.22 | 0.00 | ALL | GTB-3 |
| chr17:39792888T>TTTTGCC | IKZF3      | 0.28 | 0.00 | ALL | GTB-3 |
| chr17:4112695T>A        | ZZEF1      | 0.00 | 0.28 | MM  | GTB-3 |
| chr17:6596220C>T        | KIAA0753   | 0.00 | 0.06 | MM  | GTB-3 |
| chr17:76736877G>A       | SRSF2      | 0.00 | 0.06 | MM  | GTB-3 |
| chr17:7673803G>A        | TP53       | 0.66 | 0.00 | ALL | GTB-3 |
| chr17:81512182A>C       | ACTG1      | 0.00 | 0.62 | MM  | GTB-3 |
| chr18:3067455T>G        | MYOM1      | 0.33 | 0.00 | ALL | GTB-3 |
| chr18:63901872G>A       | SERPINB2   | 0.00 | 0.36 | MM  | GTB-3 |
| chr18:70054242G>A       | RTTN       | 0.00 | 0.43 | MM  | GTB-3 |
| chr19:38192331C>T       | SIPA1L3    | 0.00 | 0.30 | MM  | GTB-3 |
| chr19:40605220G>A       | LTBP4      | 0.00 | 0.30 | MM  | GTB-3 |
| chr19:41506185C>T       | AC243960.2 | 0.00 | 0.25 | MM  | GTB-3 |
| chr19:49189056G>C       | TRPM4      | 0.36 | 0.00 | ALL | GTB-3 |
| chr19:51588352C>T       | ZNF175     | 0.00 | 0.05 | MM  | GTB-3 |
| chr19:55346243G>A       | KMT5C      | 0.00 | 0.29 | MM  | GTB-3 |
| chr1:111282535C>G       | CHIAP2     | 0.38 | 0.00 | ALL | GTB-3 |
| chr1:156540031C>T       | IQGAP3     | 0.00 | 0.39 | MM  | GTB-3 |
| chr1:205524355C>G       | CDK18      | 0.00 | 0.50 | MM  | GTB-3 |
| chr1:225877498T>A       | TMEM63A    | 0.33 | 0.00 | ALL | GTB-3 |
| chr1:23456043G>A        | ASAP3      | 0.00 | 0.29 | MM  | GTB-3 |
| chr1:29305363C>T        | PTPRU      | 0.39 | 0.00 | ALL | GTB-3 |
| chr1:58576628T>C        | TACSTD2    | 0.28 | 0.00 | ALL | GTB-3 |
| chr1:58576629CAGCTCGGC  | TACSTD2    | 0.28 | 0.00 | ALL | GTB-3 |
| chr1:64678155G>T        | CACHD1     | 0.00 | 0.43 | MM  | GTB-3 |
| chr20:46726240G>A       | SLC2A10    | 0.00 | 0.40 | MM  | GTB-3 |
| chr20:59253878T>C       | ZNF831     | 0.00 | 0.45 | MM  | GTB-3 |
| chr21:42762110G>C       | PDE9A      | 0.34 | 0.00 | ALL | GTB-3 |
| chr22:18401273C>T       | PPP1R26P3  | 0.19 | 0.00 | ALL | GTB-3 |
| chr22:22888262A>G       | IGLL5      | 0.00 | 0.57 | MM  | GTB-3 |
| chr22:43258182G>A       | SCUBE1     | 0.00 | 0.43 | MM  | GTB-3 |
| chr22:45550517C>A       | FBLN1      | 0.00 | 0.43 | MM  | GTB-3 |
| chr2:130916551G>T       | ARHGEF4    | 0.00 | 0.42 | MM  | GTB-3 |
| chr2:131492500G>C       | MZT2A      | 0.00 | 0.08 | MM  | GTB-3 |
| chr2:1477502C>T         | TPO        | 0.41 | 0.00 | ALL | GTB-3 |
| chr2:209709962C>A       | MAP2       | 0.27 | 0.00 | ALL | GTB-3 |
| chr2:96279556A>G        | SNRNP200   | 0.29 | 0.00 | ALL | GTB-3 |
| chr3:36831442T>A        | TRANK1     | 0.65 | 0.00 | ALL | GTB-3 |
| chr3:37473397C>A        | ITGA9      | 0.61 | 0.00 | ALL | GTB-3 |
| chr3:38847417T>C        | SCN11A     | 0.00 | 0.40 | MM  | GTB-3 |
| chr4:143469223A>C       | GAB1       | 0.00 | 0.46 | MM  | GTB-3 |

|                    |            |      |      |     |       |
|--------------------|------------|------|------|-----|-------|
| chr4:40243823A>C   | RHOH       | 0.63 | 0.00 | ALL | GTB-3 |
| chr4:55592192G>A   | PDCL2      | 0.00 | 0.10 | MM  | GTB-3 |
| chr4:55870779G>A   | EXOC1      | 0.00 | 0.48 | MM  | GTB-3 |
| chr4:61998201T>C   | ADGRL3     | 0.00 | 0.57 | MM  | GTB-3 |
| chr4:73487114T>A   | AFM        | 0.00 | 0.54 | MM  | GTB-3 |
| chr5:11083841C>A   | CTNND2     | 0.25 | 0.00 | ALL | GTB-3 |
| chr5:139392131C>T  | MZB1       | 0.00 | 0.32 | MM  | GTB-3 |
| chr5:140824019G>T  | PCDHA1     | 0.00 | 0.32 | MM  | GTB-3 |
| chr5:171213726T>G  | RANBP17    | 0.09 | 0.00 | ALL | GTB-3 |
| chr5:7885888G>C    | MTRR       | 0.36 | 0.00 | ALL | GTB-3 |
| chr6:10773092T>G   | AL024498.2 | 0.00 | 0.42 | MM  | GTB-3 |
| chr6:111411528T>C  | REV3L      | 0.00 | 0.38 | MM  | GTB-3 |
| chr6:117341329C>A  | AL132671.2 | 0.42 | 0.00 | ALL | GTB-3 |
| chr6:32522218G>C   | HLA-DRB5   | 0.73 | 0.00 | ALL | GTB-3 |
| chr6:32814485T>G   | AL669918.1 | 0.31 | 0.00 | ALL | GTB-3 |
| chr6:46596142G>T   | CYP39A1    | 0.00 | 0.38 | MM  | GTB-3 |
| chr6:55333823C>A   | GFRAL      | 0.00 | 0.32 | MM  | GTB-3 |
| chr6:99425318T>C   | PNISR      | 0.00 | 0.44 | MM  | GTB-3 |
| chr7:111868099G>A  | DOCK4      | 0.00 | 0.62 | MM  | GTB-3 |
| chr7:11417616A>G   | THSD7A     | 0.00 | 0.61 | MM  | GTB-3 |
| chr7:128852944G>A  | FLNC       | 0.00 | 0.08 | MM  | GTB-3 |
| chr7:148814123G>A  | EZH2       | 0.44 | 0.00 | ALL | GTB-3 |
| chr7:151035703C>G  | ABC8       | 0.00 | 0.28 | MM  | GTB-3 |
| chr7:152113260C>G  | GALNT11    | 0.57 | 0.00 | ALL | GTB-3 |
| chr8:104013644T>G  | RIMS2      | 0.00 | 0.49 | MM  | GTB-3 |
| chr8:112666377T>G  | CSMD3      | 0.00 | 0.45 | MM  | GTB-3 |
| chr8:144049346C>A  | OPLAH      | 0.39 | 0.00 | ALL | GTB-3 |
| chr8:144414979C>T  | SLC39A4    | 0.00 | 0.20 | MM  | GTB-3 |
| chr8:39648401T>A   | ADAM18     | 0.00 | 0.45 | MM  | GTB-3 |
| chr9:106974355G>C  | ZNF462     | 0.62 | 0.00 | ALL | GTB-3 |
| chr9:35094257T>C   | PIGO       | 0.18 | 0.00 | ALL | GTB-3 |
| chr9:37518181C>T   | FBXO10     | 0.00 | 0.22 | MM  | GTB-3 |
| chr9:37522932C>T   | FBXO10     | 0.00 | 0.25 | MM  | GTB-3 |
| chr9:65691020C>T   | CBWD5      | 0.00 | 0.43 | MM  | GTB-3 |
| chr9:99036414C>G   | COL15A1    | 0.62 | 0.00 | ALL | GTB-3 |
| chrX:111724904A>G  | ALG13      | 0.70 | 0.00 | ALL | GTB-3 |
| chrX:130016199T>A  | BCORL1     | 0.78 | 0.00 | ALL | GTB-3 |
| chrX:147938107G>C  | FMR1       | 0.92 | 0.00 | ALL | GTB-3 |
| chrX:22099113T>A   | PHEX       | 0.70 | 0.00 | ALL | GTB-3 |
| chrX:32412073G>GA  | DMD        | 0.00 | 0.35 | MM  | GTB-3 |
| chrX:45079246T>C   | KDM6A      | 0.00 | 0.45 | MM  | GTB-3 |
| chr10:101010614C>G | LZTS2      | 0.00 | 0.27 | MM  | GTB-8 |
| chr10:38448153C>G  | AL133216.2 | 0.00 | 0.14 | MM  | GTB-8 |
| chr10:47999735C>T  | FAM25C     | 0.00 | 0.15 | MM  | GTB-8 |
| chr10:48206952G>A  | FRMPD2     | 0.00 | 0.28 | MM  | GTB-8 |
| chr11:112045139C>T | DLAT       | 0.00 | 0.12 | MM  | GTB-8 |
| chr11:48991502C>T  | TRIM53CP   | 0.00 | 0.23 | MM  | GTB-8 |
| chr11:48991609T>C  | TRIM53CP   | 0.00 | 0.12 | MM  | GTB-8 |
| chr11:63468452G>T  | HRASLS5    | 0.00 | 0.21 | MM  | GTB-8 |
| chr11:64315787G>A  | PRDX5      | 0.00 | 0.23 | MM  | GTB-8 |
| chr11:78210604A>G  | GAB2       | 0.00 | 0.18 | MM  | GTB-8 |
| chr12:13071317C>T  | FAM234B    | 0.00 | 0.27 | MM  | GTB-8 |

|                   |            |      |      |     |       |
|-------------------|------------|------|------|-----|-------|
| chr12:40558111C>A | RNU6-713P  | 0.00 | 0.21 | MM  | GTB-8 |
| chr12:6464898A>G  | TAPBPL     | 0.00 | 0.31 | MM  | GTB-8 |
| chr12:9310388A>G  | AC009533.1 | 0.00 | 0.23 | MM  | GTB-8 |
| chr13:30932766C>T | TEX26      | 0.00 | 0.14 | MM  | GTB-8 |
| chr13:98395783G>A | FARP1      | 0.62 | 0.00 | ALL | GTB-8 |
| chr15:25721820G>A | ATP10A     | 0.27 | 0.00 | ALL | GTB-8 |
| chr15:40807758C>G | DNAJC17    | 0.00 | 0.16 | MM  | GTB-8 |
| chr15:49862348T>G | ATP8B4     | 0.00 | 0.17 | MM  | GTB-8 |
| chr15:55680114G>T | PRTG       | 0.00 | 0.19 | MM  | GTB-8 |
| chr15:71901190C>T | MYO9A      | 0.09 | 0.00 | ALL | GTB-8 |
| chr16:33287G>A    | Z84723.1   | 0.00 | 0.09 | MM  | GTB-8 |
| chr16:64950995G>A | CDH11      | 0.58 | 0.00 | ALL | GTB-8 |
| chr16:71745407G>T | AP1G1      | 0.00 | 0.13 | MM  | GTB-8 |
| chr16:87839839G>A | SLC7A5     | 0.00 | 0.19 | MM  | GTB-8 |
| chr17:4901601C>G  | CHRNE      | 0.00 | 0.16 | MM  | GTB-8 |
| chr17:75752508C>T | ITGB4      | 0.00 | 0.49 | MM  | GTB-8 |
| chr17:7675160G>C  | TP53       | 0.57 | 0.00 | ALL | GTB-8 |
| chr17:7890884C>G  | CHD3       | 0.00 | 0.18 | MM  | GTB-8 |
| chr18:11644582G>A | NPIP1P     | 0.00 | 0.18 | MM  | GTB-8 |
| chr18:11644680G>T | NPIP1P     | 0.00 | 0.12 | MM  | GTB-8 |
| chr18:11644734T>C | AP001120.3 | 0.00 | 0.10 | MM  | GTB-8 |
| chr18:23873026C>T | LAMA3      | 0.00 | 0.24 | MM  | GTB-8 |
| chr18:2707623T>G  | SMCHD1     | 0.00 | 0.17 | MM  | GTB-8 |
| chr18:54337298C>T | STARD6     | 0.00 | 0.26 | MM  | GTB-8 |
| chr19:35780031G>T | ARHGAP33   | 0.37 | 0.00 | ALL | GTB-8 |
| chr19:41893271C>G | ARHGEF1    | 0.44 | 0.00 | ALL | GTB-8 |
| chr19:44386639C>T | AC245748.1 | 0.00 | 0.20 | MM  | GTB-8 |
| chr19:4818341C>T  | TICAM1     | 0.38 | 0.00 | ALL | GTB-8 |
| chr19:50261509G>A | MYH14      | 0.31 | 0.00 | ALL | GTB-8 |
| chr19:757154G>A   | MISP       | 0.00 | 0.14 | MM  | GTB-8 |
| chr1:112584110C>A | ST7L       | 0.00 | 0.11 | MM  | GTB-8 |
| chr1:16490636T>C  | CROCCP3    | 0.00 | 0.16 | MM  | GTB-8 |
| chr1:16539463A>G  | LINC01783  | 0.27 | 0.00 | ALL | GTB-8 |
| chr1:171989112G>A | DNM3       | 0.00 | 0.18 | MM  | GTB-8 |
| chr1:201070350A>C | CACNA1S    | 0.35 | 0.00 | ALL | GTB-8 |
| chr1:207759746A>T | CD46       | 0.08 | 0.00 | ALL | GTB-8 |
| chr1:21471661A>G  | NBPF3      | 0.00 | 0.20 | MM  | GTB-8 |
| chr1:228458424G>A | HIST3H2BB  | 0.00 | 0.09 | MM  | GTB-8 |
| chr1:23967872A>T  | PNRC2      | 0.00 | 0.15 | MM  | GTB-8 |
| chr1:37761292C>T  | EPHA10     | 0.00 | 0.23 | MM  | GTB-8 |
| chr1:39413241C>T  | MACF1      | 0.00 | 0.13 | MM  | GTB-8 |
| chr1:74571401G>A  | ERICH3     | 0.34 | 0.00 | ALL | GTB-8 |
| chr20:36927183G>A | SAMHD1     | 0.00 | 0.11 | MM  | GTB-8 |
| chr20:43532941G>A | L3MBTL1    | 0.00 | 0.42 | MM  | GTB-8 |
| chr20:50619977C>T | RIPOR3     | 0.00 | 0.19 | MM  | GTB-8 |
| chr22:22630104G>A | BCRP4      | 0.00 | 0.21 | MM  | GTB-8 |
| chr2:219329755C>A | RESP18     | 0.63 | 0.00 | ALL | GTB-8 |
| chr2:235807742C>A | AGAP1      | 0.05 | 0.00 | ALL | GTB-8 |
| chr3:112266280G>A | SLC9C1     | 0.00 | 0.26 | MM  | GTB-8 |
| chr3:160436258G>A | TRIM59     | 0.00 | 0.16 | MM  | GTB-8 |
| chr3:189631637G>C | TP63       | 0.00 | 0.10 | MM  | GTB-8 |
| chr3:24190196G>A  | THRB       | 0.00 | 0.25 | MM  | GTB-8 |



|                         |             |      |      |     |       |
|-------------------------|-------------|------|------|-----|-------|
| chr3:39189129A>G        | XIRP1       | 0.00 | 0.10 | MM  | GTB-8 |
| chr3:48644289C>A        | CELSR3      | 0.00 | 0.18 | MM  | GTB-8 |
| chr4:186603474C>A       | FAT1        | 0.00 | 0.27 | MM  | GTB-8 |
| chr4:5331285G>A         | STK32B      | 0.00 | 0.22 | MM  | GTB-8 |
| chr4:5622830G>T         | EVC2        | 0.00 | 0.21 | MM  | GTB-8 |
| chr4:69419027T>C        | UGT2B24P    | 0.00 | 0.23 | MM  | GTB-8 |
| chr5:1295397G>A         | TERT        | 0.37 | 0.00 | ALL | GTB-8 |
| chr5:13862708G>T        | DNAH5       | 0.00 | 0.10 | MM  | GTB-8 |
| chr5:138886218C>T       | CTNNA1      | 0.00 | 0.13 | MM  | GTB-8 |
| chr5:141158033C>T       | PCDHB6      | 0.00 | 0.19 | MM  | GTB-8 |
| chr5:141234631T>C       | AC244517.10 | 0.00 | 0.11 | MM  | GTB-8 |
| chr5:141423925T>C       | PCDHGA2     | 0.00 | 0.15 | MM  | GTB-8 |
| chr5:177514976T>C       | DDX41       | 0.00 | 0.19 | MM  | GTB-8 |
| chr5:177631524A>G       | AC139795.1  | 0.00 | 0.15 | MM  | GTB-8 |
| chr5:90405729C>T        | CETN3       | 0.00 | 0.24 | MM  | GTB-8 |
| chr6:166366076C>T       | MPC1        | 0.00 | 0.14 | MM  | GTB-8 |
| chr6:167208796C>T       | AL353747.1  | 0.00 | 0.29 | MM  | GTB-8 |
| chr6:42619432T>A        | UBR2        | 0.24 | 0.00 | ALL | GTB-8 |
| chr6:65837457G>T        | ADH5P4      | 0.57 | 0.00 | ALL | GTB-8 |
| chr6:84055263C>T        | MRAP2       | 0.00 | 0.19 | MM  | GTB-8 |
| chr6:99425375A>G        | PNISR       | 0.00 | 0.09 | MM  | GTB-8 |
| chr7:101040055C>T       | MUC17       | 0.00 | 0.14 | MM  | GTB-8 |
| chr7:128754693A>T       | CALU        | 0.00 | 0.14 | MM  | GTB-8 |
| chr7:151041129G>A       | ABC8        | 0.32 | 0.00 | ALL | GTB-8 |
| chr7:42148225C>T        | GLI3        | 0.00 | 0.15 | MM  | GTB-8 |
| chr7:4860526G>C         | RADIL       | 0.00 | 0.28 | MM  | GTB-8 |
| chr7:63572321G>A        | TNRC18P2    | 0.00 | 0.15 | MM  | GTB-8 |
| chr8:125433263G>C       | TRIB1       | 0.00 | 0.22 | MM  | GTB-8 |
| chr8:8020012C>G         | FAM90A24P   | 0.00 | 0.19 | MM  | GTB-8 |
| chr9:127732512C>T       | TOR2A       | 0.00 | 0.13 | MM  | GTB-8 |
| chr9:128498410T>G       | ODF2        | 0.61 | 0.00 | ALL | GTB-8 |
| chr9:129099908C>T       | CRAT        | 0.00 | 0.20 | MM  | GTB-8 |
| chr9:34372875G>C        | MYORG       | 0.00 | 0.15 | MM  | GTB-8 |
| chr9:76709219A>ATGACTG` | PRUNE2      | 0.00 | 0.14 | MM  | GTB-8 |
| chr9:76846602G>A        | PRUNE2      | 0.00 | 0.22 | MM  | GTB-8 |
| chrX:149505093C>T       | IDS         | 0.15 | 0.00 | ALL | GTB-8 |
| chrX:152728157G>C       | CSAG1       | 0.00 | 0.21 | MM  | GTB-8 |
| chrX:152728158T>A       | CSAG1       | 0.00 | 0.21 | MM  | GTB-8 |
